# Supplementary material for: Wheat gibberellin oxidase genes and their functions in regulating tillering
Source: PeerJ. 2023 Sep 1;11:e15924. doi: 10.7717/peerj.15924 (PMC10476609; doi:10.7717/peerj.15924)
Supplement: Supplemental Information 5 [file peerj-11-15924-s005.xlsx]

## Sheet: Table S1
Supplementary Table S1 The expression levels of TaGAox genes in different organs/tissues of Chinese Spring
Gene name	Gene ID	roots	stem	leaf	spike	grain
TaGA20ox-A1	TraesCS4A02G319100	1.22419	0.77961	0.782358	0.368492	0.0364402
TaGA20ox-B1	TraesCS5B02G560300	0.533829	0.548809	1.09146	0.414101	0.0220126
TaGA20ox-D1	TraesCS5D02G566200	0.885831	1.15656	0.74781	0.465119	0.0841699
TaGA20ox-A2	TraesCS3A02G406200	0.021903	0.603351	0.938114	0.0669566	0
TaGA20ox-B2	TraesCS3B02G439900	0	0.633115	1.63986	0.142468	0
TaGA20ox-D2	TraesCS3D02G401400	0.0427597	0.615335	1.54782	0.150577	0.00511312
TaGA20ox-A3	TraesCS3A02G399800	0	0	0	0	2.11075
TaGA20ox-B3	TraesCS3B02G432800	0.0538345	0	0	0	3.14134
TaGA20ox-D3-2	TraesCS3D02G393900	0	0.0260749	0.0112587	0.0183608	0.378172
TaGA20ox-D3-1	TraesCS3D02G394000	0.0301917	0.0120911	0	0	0.30416
TaGA20ox-A4	TraesCS1A02G263600	0	0.0127013	0.114079	0.21962	0.0421239
TaGA20ox-B4	TraesCS1B02G274200	0.221477	0.115316	0.0393949	0.175141	0
TaGA20ox-D4	TraesCS1D02G263700	0.0285172	0	0.100666	0.101697	0.0689962
TaGA7ox-A1	TraesCS4A02G234100	7.18432	1.76514	2.12968	1.37275	14.6016
TaGA7ox-D1	TraesCS4D02G079900	1.22419	0.252254	1.40759	1.4564	5.70858
TaGA7ox-D2	TraesCS3D02G074300	0.631453	4.69377e-05	0	0.047336	0
TaGA2ox-A1	TraesCS1A02G106200	0.236346	0.381894	0.0910023	0.258006	0.0980755
TaGA2ox-B1	TraesCS1B02G123500	0.298843	0.396364	0.088882	0.310377	0.0562578
TaGA2ox-D1	TraesCS1D02G108800	0.24633	0.392546	0.0904675	0.146935	0.131764
TaGA2ox-A2	TraesCS7A02G450000	0	0	0	0	0
TaGA2ox-B2	TraesCS7B02G349700	0	0	0	0	0
TaGA2ox-D2	TraesCS7D02G439200	0	0	0.0157701	0	0
TaGA2ox-A3	TraesCS3A02G294000	3.06396	1.86231	0.498192	0.842904	0.0149436
TaGA2ox-B3	TraesCS3B02G328700	3.97352	1.94476	0.422268	0.431024	0.106463
TaGA2ox-D3	TraesCS3D02G293800	2.45009	2.36315	0.240747	0.832238	0.0813033
TaGA2ox-A4	TraesCS1A02G334400	0.645181	2.49444	6.83892	0.0222837	0
TaGA2ox-B4	TraesCS1B02G347600	0.0704357	1.87104	5.8451	0.0074514	0
TaGA2ox-D4	TraesCS1D02G336900	0	2.06431	2.74638	0.0720232	0
TaGA2ox-A5	TraesCS3A02G537300	1.15777	0.132749	0.0504657	0.0348571	0.0429662
TaGA2ox-B5	TraesCS3B02G603000	2.06115	0.0199755	0	0	0.0513742
TaGA2ox-D5	TraesCS3D02G542800	1.2521	0.0249362	0.0408461	0	0.0815257
TaGA2ox-A6	TraesCS2A02G379000	0.0628692	0.0846788	0.0919183	0	0
TaGA2ox-D6	TraesCS2B02G396000	0.358289	0.0297827	0.230699	0	0
TaGA2ox-D6	TraesCS2D02G375300	0.430347	0.0161066	0.128401	0.0957564	0
TaGA2ox-A7	TraesCS3A02G133400	0.133125	0.0557516	0.480837	0.42169	1.66419
TaGA2ox-B7	TraesCS3B02G166100	0.026919	0.72853	1.81505	0.305884	1.54782
TaGA2ox-D7	TraesCS3D02G149600	0.282419	0.34533	2.95993	0.272737	2.72522
TaGA2ox-A8	TraesCS1A02G392500	0.0560653	0.0367162	0.0206096	0.0200839	0
TaGA2ox-B8	TraesCS1B02G420800	0.0733805	0.581093	0.0273526	0.106683	0.00517356
TaGA2ox-D8	TraesCS1D02G400700	0	0.942482	0.023338	0	0.00707477
TaGA2ox-A9	TraesCS6A02G221900	0.517298	0.698847	0.450184	0.0856673	0
TaGA2ox-B9	TraesCS6B02G259200	0.287509	1.87324	0.347363	0.0507479	0
TaGA2ox-D9	TraesCS6D02G213100	0.551583	0.629754	2.0566	0.297734	0
TaGA2ox-A10	TraesCS1A02G126400	0.0268693	0.291191	0.305924	0.381294	0.137464
TaGA2ox-B10	TraesCS1B02G145600	0	0.84631	0.432205	0.290252	0.0315945
TaGA2ox-D10	TraesCS1D02G127000	0.0760365	0.256962	0.387821	0.12415	0.17941
TaGA2ox-A11	TraesCS4A02G033200	0	0	0	0.0129755	0
TaGA2ox-B11	TraesCS4B02G272100	0	0	0	0	0
TaGA2ox-D11	TraesCS4B02G376100	0	0	0	0	0
TaGA2ox-B12	TraesCS4D02G271300	0	0	0.0655858	0	0
TaGA2ox-B13	TraesCS4B02G376200	0	0	0.0324605	0	0
TaGA2ox-A14	TraesCS5A02G543100	0	0	0	0	0
TaGA2ox-B15	TraesCS1B02G420700	0.0517095	1.11817	0.16488	0	0
TaGA2ox-A16	TraesCS1A02G392600	0	0.0242962	0.0111956	0.0111212	0
TaGA2ox-B16	TraesCS1B02G420900	0	0.0758678	0	0.0210963	0
TaGA2ox-D16	TraesCS1D02G400800	0	0.05623	0	0.0404264	0
TaGA3ox-A1	TraesCS2A02G540400	0	0	0	0	3.20029
TaGA3ox-B1	TraesCS2B02G570800	0	0	0	0	0.0113472
TaGA3ox-D1	TraesCS2D02G542100	0	0	0	0	0
TaGA3ox-A2	TraesCS3A02G122600	0.670669	1.56829	0.12215	0.775068	0.0339877
TaGA3ox-B2	TraesCS3B02G141800	0.338008	6.78925	0.259599	1.65829	0
TaGA3ox-D2	TraesCS3D02G124500	0.73478	0	0	0	5.54706
TaGA1ox-B1	TraesCS2B02G570800	0.429738	3.24883	0.147704	0.391527	0
