# Supplementary material for: Wheat gibberellin oxidase genes and their functions in regulating tillering
Source: PeerJ. 2023 Sep 1;11:e15924. doi: 10.7717/peerj.15924 (PMC10476609; doi:10.7717/peerj.15924)
Supplement: Supplemental Information 6 [file peerj-11-15924-s006.xlsx]

## Sheet: Table S2
Supplementary Table S2 DNA sequences of the primers used in qRT-PCR
Gene_name	Forward (5'-3')	Reverse (5'-3')
TaGA20ox-A1	TGAACCTACCAGACAGAGGA	CTCATGGCTCATGGCAGT
TaGA20ox-B2	CGACACCTTCATGGCTCTGT	CGTGGATCGATCGGTAGCAG
TaGA20ox-A4	CCAAGGGACTGTCTAGTGTG	CAGAGATTGGTTCGCAACAG
TaGA7ox-A1	GCATCTCCCCGTTTGTAGTA	TATGGGACGGAGAGAGTGAT
TaGA7ox-D1	AGGTATGACGCCTACAACTG	AACGGGAGGGACTTTTTAGG
TaGA2ox10	AGTATCTCCTGCTCGGTGTCT	CAGAAGGTCGCGGAAAGAGCAG
TaGA2ox-A1	CACAAATGACACAACTCCCA	CGCTTCACGTGCGTATACAA
TaGA2ox-A3	CATAGTTGCTAAAACCCGCC	GCCACCCTCTGCTAGTATATC
TaGA2ox-D7	CTTCACCTGGAAGGAGTACA	TATAGCCTGCAGTATAAGGCTC
TaGA2ox-A16	GGAGCTGTTTACTGTACCTGTT	CCATGTAGCAACAACTAGTCCT
TaGA3ox-A2	ATTGCAGATGATGCTGGTGGA	TGGCATGCTTAGATGCAGATGT
TaGA3ox-B2	TACATGGGTGTGCGCAAGAA	GCTAATCTAACAGCCCGCCA
TaGA3ox-D2	TCGCCATCTCCACTGACAAC	CCTCAGCTAAGCTACCAGCC
Supplementary Table S2 The specific primers used in PCR identifying transgenic lines
Gene_name	Forward (5'-3')	Reverse(5'-3')	size of the products (bp)	function
TaGA7ox-A1	F1:ACGGGGGACTCTTGACCATGGTAATGGGCGGCCTCTCCATGGAC	R1: AAGTTCTTCTCCTTTACTAGTAGATCGGTCCTTTCTGAAGT	1088	gene isolation
	F2:ACGGGGGACTCTTGACCATGGTAATGGGCGGCCTCTCCATGGAC	R2: TTCAGCACGTGTCTTGTAGTT	1400	transgenic plant verification
