# Supplementary material for: Wheat gibberellin oxidase genes and their functions in regulating tillering
Source: PeerJ. 2023 Sep 1;11:e15924. doi: 10.7717/peerj.15924 (PMC10476609; doi:10.7717/peerj.15924)
Supplement: Supplemental Information 7 [file peerj-11-15924-s007.xlsx]

## Sheet: Table S3
Supplementary Table S3 The basic information of GAoxs in wheat
Gene name	Gene ID	Chromosomes	Physical position	Length of CDS	Amino acid length / aa	Molecular weight / KDa	Theoretical pI	Aliphatic index	GRAVY
								Aliphatic	GRAVY
								index
TaGA20ox-A1	TraesCS4A02G319100.1	4A	608043459-608044983	1098	365	40.7053	6.27	79.1	-0.236
TaGA20ox-B1	TraesCS5B02G560300.1	5B	706852386-706854024	1104	367	40.8435	6.14	78.42	-0.238
TaGA20ox-D1	TraesCS5D02G566200.1	5D	564586783-564588466	1086	361	40.2928	6.07	77.81	-0.264
TaGA20ox-A2	TraesCS3A02G406200.1	3A	650429119-650433106	1329	442	48.1327	8.38	72.29	-0.284
TaGA20ox-B2	TraesCS3B02G439900.1	3B	679203646-679206846	1266	421	46.1665	8.53	72.38	-0.27
TaGA20ox-D2	TraesCS3D02G401400.1	3D	515965563-515968953	1311	436	47.6791	8.74	72.13	-0.293
TaGA20ox-A3	TraesCS3A02G399800.1	3A	646684126-646685856	1077	358	39.2305	5.94	81.82	-0.114
TaGA20ox-B3	TraesCS3B02G432800.1	3B	671843949-671845692	1083	360	39.6498	5.63	81.06	-0.168
TaGA20ox-D3-2	TraesCS3D02G393900.1	3D	508612818-508614793	1071	356	39.1554	6	81.43	-0.137
TaGA20ox-D3-1	TraesCS3D02G394000.1	3D	509076940-509078554	1080	359	39.5528	6.07	78.3	-0.181
TaGA20ox-A4	TraesCS1A02G263600.1	1A	459097180-459100473	1200	399	43.7263	6.1	74.41	-0.277
TaGA20ox-B4	TraesCS1B02G274200.1	1B	481294444-481299692	1239	412	44.9597	5.86	75.17	-0.251
TaGA20ox-D4	TraesCS1D02G263700.1	1D	359611482-359614204	1239	412	44.9978	5.77	74.47	-0.242
TaGA7ox-A1	TraesCS4A02G234100.1	4A	543331966-543333681	1047	348	39.3532	5.21	77.67	-0.47
TaGA7ox-D1	TraesCS4D02G079900.1	4D	53862639-53864410	1047	348	39.1689	5.14	76.26	-0.479
TaGA7ox-D2	TraesCS3D02G074300.2	3D	35252955-35254240	954	317	35.378	5.55	72.37	-0.314
TaGA2ox-A1	TraesCS1A02G106200.1	1A	103631843-103636595	1122	373	39.8555	6.63	84.29	-0.209
TaGA2ox-B1	TraesCS1B02G123500.1	1B	150059639-150064427	1122	373	39.8454	6.67	84.8	-0.198
TaGA2ox-D1	TraesCS1D02G108800.1	1D	101576524-101581299	1122	373	39.788	6.86	84.83	-0.212
TaGA2ox-A2	TraesCS7A02G450000.1	7A	643836844-643840144	1029	342	36.5194	6.09	85.12	-0.139
TaGA2ox-B2	TraesCS7B02G349700.1	7B	606556159-606563497	1062	353	37.4874	6.15	88.27	-0.089
TaGA2ox-D2	TraesCS7D02G439200.1	7D	558954559-558957153	1059	352	37.4542	5.79	84.38	-0.191
TaGA2ox-A3	TraesCS3A02G294000.1	3A	526863388-526865737	981	326	34.9859	7.08	85.92	-0.004
TaGA2ox-B3	TraesCS3B02G328700.1	3B	530609281-530611569	981	326	35.4399	7.68	85	-0.012
TaGA2ox-D3	TraesCS3D02G293800.1	3D	404439874-404442350	981	326	35.3194	7.04	85.31	-0.01
TaGA2ox-A4	TraesCS1A02G334400.1	1A	521876736-521878499	1032	343	36.7017	7.79	85.92	-0.104
TaGA2ox-B4	TraesCS1B02G347600.1	1B	576686977-576688732	1023	340	36.5106	7.13	88.38	-0.059
TaGA2ox-D4	TraesCS1D02G336900.1	1D	426869492-426870633	1032	343	36.7698	7.06	86.73	-0.1
TaGA2ox-A5	TraesCS3A02G537300.2	3A	749203153-749204070	918	305	33.3027	8.41	74.92	-0.358
TaGA2ox-B5	TraesCS3B02G603000.1	3B	822819355-822820338	984	327	35.3608	4.98	82.75	-0.155
TaGA2ox-D5	TraesCS3D02G542800.1	3D	613597347-613599060	1017	338	36.9528	5.1	81.48	-0.22
TaGA2ox-A6	TraesCS2A02G379000.1	2A	621920442-621922644	1092	363	39.9915	6.41	79.37	-0.263
TaGA2ox-B6	TraesCS2B02G396000.1	2B	562217205-562219581	1092	363	39.8884	6.01	78.82	-0.25
TaGA2ox-D6	TraesCS2D02G375300.1	2D	479179051-479181453	1083	360	39.5019	6.2	77.58	-0.266
TaGA2ox-A7	TraesCS3A02G133400.1	3A	110332577-110335329	1029	342	36.2895	6.12	88.57	-0.001
TaGA2ox-B7	TraesCS3B02G166100.1	3B	166501030-166503617	1026	341	36.2002	6.34	85.92	-0.031
TaGA2ox-D7	TraesCS3D02G149600.1	3D	114335561-114338263	1026	341	36.3375	6.12	87.1	-0.032
TaGA2ox-A8	TraesCS1A02G392500.1	1A	559044031-559045698	1074	357	37.8129	6.27	89.44	-0.022
TaGA2ox-B8	TraesCS1B02G420800.1	1B	644525709-644527654	1212	403	42.7989	8.06	85.56	-0.108
TaGA2ox-D8	TraesCS1D02G400700.1	1D	467106998-467108643	1074	357	37.7944	6.16	89.44	-0.057
TaGA2ox-A9	TraesCS6A02G221900.1	6A	413732327-413735532	1044	347	37.6868	5.83	74.58	-0.171
TaGA2ox-B9	TraesCS6B02G259200.1	6B	468008956-468011870	1044	347	37.6208	5.52	74.58	-0.149
TaGA2ox-D9	TraesCS6D02G213100.1	6D	302248307-302251368	1044	347	37.7099	6.25	74.87	-0.183
TaGA2ox-A10	TraesCS1A02G126400.1	1A	151873014-151877402	1062	353	38.5225	7.76	84.84	-0.129
TaGA2ox-B10	TraesCS1B02G145600.1	1B	199662829-199666423	1056	351	37.9623	9.19	84.5	-0.146
TaGA2ox-D10	TraesCS1D02G127000.1	1D	139143092-139147941	1053	350	37.724	7.77	85.03	-0.117
TaGA2ox-A11	TraesCS4A02G033200.1	4A	25496608-25497810	1104	367	40.3647	5.57	77.38	-0.245
TaGA2ox-B11	TraesCS4B02G272100.1	4B	548766774-548767971	1101	366	39.9292	6.71	74.43	-0.269
TaGA2ox-D11	TraesCS4D02G271300.1	4D	441900869-441902067	1104	367	39.9753	5.52	76.08	-0.273
TaGA2ox-B12	TraesCS4B02G376200.1	4B	660089828-660092743	1065	354	38.4496	5.51	72.8	-0.188
TaGA2ox-B13	TraesCS4B02G376100.1	4B	659688184-659689650	1032	343	37.897	5.95	74.9	-0.299
TaGA2ox-A14	TraesCS5A02G543100.1	5A	698888618-698889913	1074	357	38.7178	5.69	79.52	-0.153
TaGA2ox-B15	TraesCS1B02G420700.1	1B	643906713-643908426	1182	393	41.7775	4.92	86.9	-0.184
TaGA2ox-A16	TraesCS1A02G392600.1	1A	559349304-559350846	1065	354	37.5599	5.93	91.27	0.018
TaGA2ox-B16	TraesCS1B02G420900.1	1B	644797483-644799026	1068	355	37.585	6.46	90.76	-0.019
TaGA2ox-D16	TraesCS1D02G400800.1	1D	467299302-467300901	1053	350	36.8531	5.93	89.26	0.005
TaGA3ox-A1	TraesCS2A02G540400.1	2A	752336231-752338033	1113	370	40.6208	5.74	79.38	-0.249
TaGA3ox-B1	TraesCS2B02G570900.1	2B	761327590-761329256	1128	375	41.3437	5.49	75.47	-0.309
TaGA3ox-D1	TraesCS2D02G542100.1	2D	620684627-620686402	1122	373	40.8973	6.46	74.83	-0.274
TaGA3ox-A2	TraesCS3A02G122600.1	3A	97972874-97974778	1113	370	40.2756	6.43	80.22	-0.08
TaGA3ox-B2	TraesCS3B02G141800.1	3B	128948207-128950128	1110	369	40.2842	6.43	82.55	-0.045
TaGA3ox-D2	TraesCS3D02G124500.1	3D	82411790-82413750	1113	370	40.3552	6.73	80.76	-0.077
TaGA1ox-B1	TraesCS2B02G570800.2	2B	761322496-761324125	1230	409	44.7829	5.93	80.9	-0.216
