# Supplementary material for: Wheat gibberellin oxidase genes and their functions in regulating tillering
Source: PeerJ. 2023 Sep 1;11:e15924. doi: 10.7717/peerj.15924 (PMC10476609; doi:10.7717/peerj.15924)
Supplement: Supplemental Information 8 [file peerj-11-15924-s008.xlsx]

## Sheet: Table S4
Supplementary Table S4 The conserved motifs in wheat GAox proteins.
Motif	Width	E value	Best possible match
motif 1	29	2.1e-1214	DALFVNVGDLFQALTNGRYKSVEHRVVAN
motif 2	21	2.8e-714	GFGPHTDPQFLTILRQBDVGG
motif 3	24	1.4e-728	PAAAAAVARACEEWGFFQVVNHGV
motif 4	15	8.7e-484	GSDSFLRLNHYPPCP
motif 5	21	1.5e-404	GYGSKSIGSNGDLGWLEYLLL
motif 6	24	2.4e-398	PRVSVIYFGGPPLDQRIAPLPELV
motif 7	23	1.8e-497	EYADAMRRLALTVLELLAEGLGL
motif 8	50	5.3e-500	EAGIAGFFALPLAEKQRARRRPGESHGYASSHIGRFASKLPWKETLSFSP
motif 9	14	6.7e-401	YRDFTWAEYKRATQ
motif 10	21	4.6e-299	ERASAAFFALPQEDKLVAGPP
