# Supplementary material for: Wheat gibberellin oxidase genes and their functions in regulating tillering
Source: PeerJ. 2023 Sep 1;11:e15924. doi: 10.7717/peerj.15924 (PMC10476609; doi:10.7717/peerj.15924)
Supplement: Supplemental Information 9 [file peerj-11-15924-s009.xlsx]

## Sheet: Table S5
Supplementary Table S5 The duplication gene pairs of GAoxs in wheat genome
Gene_ID	ID_name	Chromosomes	Gene_ID	ID_name	Chromosomes	duplication type
TraesCS1A02G263600.1	TaGA20ox-A4	1A	TraesCS1B02G274200.1	TaGA20ox-B4	1B	segmental duplication
TraesCS1A02G334400.1	TaGA2ox-A4	1A	TraesCS1B02G347600.1	TaGA2ox-B4	1B	segmental duplication
TraesCS1A02G392500.1	TaGA2ox-A8	1A	TraesCS1B02G420700.1	TaGA2ox-B15	1B	segmental duplication
TraesCS1A02G126400.1	TaGA2ox-A10	1A	TraesCS1B02G145600.1	TaGA2ox-B10	1B	segmental duplication
TraesCS1A02G106200.1	TaGA2ox-A1	1A	TraesCS1B02G123500.1	TaGA2ox-B1	1B	segmental duplication
TraesCS1A02G392500.1	TaGA2ox-A8	1A	TraesCS1D02G400700.1	TaGA2ox-D8	1D	segmental duplication
TraesCS1A02G263600.1	TaGA20ox-A4	1A	TraesCS1D02G263700.1	TaGA20ox-D4	1D	segmental duplication
TraesCS1A02G334400.1	TaGA2ox-A4	1A	TraesCS1D02G336900.1	TaGA2ox-D4	1D	segmental duplication
TraesCS1A02G126400.1	TaGA2ox-A10	1A	TraesCS1D02G127000.1	TaGA2ox-D10	1D	segmental duplication
TraesCS1A02G106200.1	TaGA2ox-A1	1A	TraesCS1D02G108800.1	TaGA2ox-D1	1D	segmental duplication
TraesCS1A02G334400.1	TaGA2ox-A4	1A	TraesCS3B02G328700.1	TaGA2ox-B3	3B	segmental duplication
TraesCS1A02G263600.1	TaGA20ox-A4	1A	TraesCS3D02G401400.1	TaGA20ox-D2	3D	segmental duplication
TraesCS1A02G334400.1	TaGA2ox-A4	1A	TraesCS3D02G293800.1	TaGA2ox-D3	3D	segmental duplication
TraesCS1B02G274200.1	TaGA20ox-B4	1B	TraesCS1D02G263700.1	TaGA20ox-D4	1D	segmental duplication
TraesCS1B02G347600.1	TaGA2ox-B4	1B	TraesCS1D02G336900.1	TaGA2ox-D4	1D	segmental duplication
TraesCS1B02G420700.1	TaGA2ox-B15	1B	TraesCS1D02G400700.1	TaGA2ox-D8	1D	segmental duplication
TraesCS1B02G123500.1	TaGA2ox-B1	1B	TraesCS1D02G108800.1	TaGA2ox-D1	1D	segmental duplication
TraesCS1B02G145600.1	TaGA2ox-B10	1B	TraesCS1D02G127000.1	TaGA2ox-D10	1D	segmental duplication
TraesCS1B02G347600.1	TaGA2ox-B4	1B	TraesCS3A02G294000.1	TaGA2ox-A3	3A	segmental duplication
TraesCS1B02G347600.1	TaGA2ox-B4	1B	TraesCS3B02G328700.1	TaGA2ox-B3	3B	segmental duplication
TraesCS1D02G336900.1	TaGA2ox-D4	1D	TraesCS3A02G294000.1	TaGA2ox-A3	3A	segmental duplication
TraesCS1D02G336900.1	TaGA2ox-D4	1D	TraesCS3B02G328700.1	TaGA2ox-B3	3B	segmental duplication
TraesCS1D02G336900.1	TaGA2ox-D4	1D	TraesCS3D02G293800.1	TaGA2ox-D3	3D	segmental duplication
TraesCS2A02G379000.1	TaGA2ox-A6	2A	TraesCS2B02G396000.1	TaGA2ox-B6	2B	segmental duplication
TraesCS2A02G540400.1	TaGA3ox-A1	2A	TraesCS2B02G570800.2	TaGA1ox-B1	2B	segmental duplication
TraesCS2A02G379000.1	TaGA2ox-A6	2A	TraesCS2D02G375300.1	TaGA2ox-D6	2D	segmental duplication
TraesCS2A02G540400.1	TaGA3ox-A1	2A	TraesCS2D02G542100.1	TaGA3ox-D1	2D	segmental duplication
TraesCS2A02G379000.1	TaGA2ox-A6	2A	TraesCS6A02G221900.1	TaGA2ox-A9	6A	segmental duplication
TraesCS2A02G379000.1	TaGA2ox-A6	2A	TraesCS6B02G259200.1	TaGA2ox-B9	6B	segmental duplication
TraesCS2A02G379000.1	TaGA2ox-A6	2A	TraesCS6D02G213100.1	TaGA2ox-D9	6D	segmental duplication
TraesCS2B02G396000.1	TaGA2ox-B6	2B	TraesCS2D02G375300.1	TaGA2ox-D6	2D	segmental duplication
TraesCS2B02G570800.2	TaGA1ox-B1	2B	TraesCS2D02G542100.1	TaGA3ox-D1	2D	segmental duplication
TraesCS2D02G375300.1	TaGA2ox-D6	2D	TraesCS6A02G221900.1	TaGA2ox-A9	6A	segmental duplication
TraesCS2D02G375300.1	TaGA2ox-D6	2D	TraesCS6B02G259200.1	TaGA2ox-B9	6B	segmental duplication
TraesCS2D02G375300.1	TaGA2ox-D6	2D	TraesCS6D02G213100.1	TaGA2ox-D9	6D	segmental duplication
TraesCS3A02G399800.1	TaGA20ox-A3	3A	TraesCS3B02G432800.1	TaGA20ox-B3	3B	segmental duplication
TraesCS3A02G406200.1	TaGA20ox-A2	3A	TraesCS3B02G439900.1	TaGA20ox-B2	3B	segmental duplication
TraesCS3A02G122600.1	TaGA3ox-A2	3A	TraesCS3B02G141800.1	TaGA3ox-B2	3B	segmental duplication
TraesCS3A02G294000.1	TaGA2ox-A3	3A	TraesCS3B02G328700.1	TaGA2ox-B3	3B	segmental duplication
TraesCS3A02G537300.2	TaGA2ox-A5	3A	TraesCS3B02G603000.1	TaGA2ox-B5	3B	segmental duplication
TraesCS3A02G133400.1	TaGA2ox-A7	3A	TraesCS3B02G166100.1	TaGA2ox-B7	3B	segmental duplication
TraesCS3A02G399800.1	TaGA20ox-A3	3A	TraesCS3D02G393900.1	TaGA20ox-D3-1	3D	segmental duplication
TraesCS3A02G406200.1	TaGA20ox-A2	3A	TraesCS3D02G401400.1	TaGA20ox-D2	3D	segmental duplication
TraesCS3A02G122600.1	TaGA3ox-A2	3A	TraesCS3D02G124500.1	TaGA3ox-D2	3D	segmental duplication
TraesCS3A02G294000.1	TaGA2ox-A3	3A	TraesCS3D02G293800.1	TaGA2ox-D3	3D	segmental duplication
TraesCS3A02G537300.2	TaGA2ox-A5	3A	TraesCS3D02G542800.1	TaGA2ox-D5	3D	segmental duplication
TraesCS3A02G133400.1	TaGA2ox-A7	3A	TraesCS3D02G149600.1	TaGA2ox-D7	3D	segmental duplication
TraesCS3B02G328700.1	TaGA2ox-B3	3B	TraesCS3D02G293800.1	TaGA2ox-D3	3D	segmental duplication
TraesCS3B02G432800.1	TaGA20ox-B3	3B	TraesCS3D02G393900.1	TaGA20ox-D3-1	3D	segmental duplication
TraesCS3B02G439900.1	TaGA20ox-B2	3B	TraesCS3D02G401400.1	TaGA20ox-D2	3D	segmental duplication
TraesCS3B02G141800.1	TaGA3ox-B2	3B	TraesCS3D02G124500.1	TaGA3ox-D2	3D	segmental duplication
TraesCS3B02G603000.1	TaGA2ox-B5	3B	TraesCS3D02G542800.1	TaGA2ox-D5	3D	segmental duplication
TraesCS3B02G166100.1	TaGA2ox-B7	3B	TraesCS3D02G149600.1	TaGA2ox-D7	3D	segmental duplication
TraesCS4A02G033200.1	TaGA2ox-A11	4A	TraesCS4B02G272100.1	TaGA2ox-B11	4B	segmental duplication
TraesCS4A02G234100.1	TaGA7ox-A1	4A	TraesCS4D02G079900.1	TaGA7ox-D1	4D	segmental duplication
TraesCS4A02G033200.1	TaGA2ox-A11	4A	TraesCS4D02G271300.1	TaGA2ox-D11	4D	segmental duplication
TraesCS4A02G319100.1	TaGA20ox-A1	4A	TraesCS5B02G560300.1	TaGA20ox-B1	5B	segmental duplication
TraesCS4A02G319100.1	TaGA20ox-A1	4A	TraesCS5D02G566200.1	TaGA20ox-D1	5D	segmental duplication
TraesCS4B02G272100.1	TaGA2ox-B11	4B	TraesCS4D02G271300.1	TaGA2ox-D11	4D	segmental duplication
TraesCS4B02G376100.1	TaGA2ox-B13	4B	TraesCS5A02G543100.1	TaGA2ox-A14	5A	segmental duplication
TraesCS5B02G560300.1	TaGA20ox-B1	5B	TraesCS5D02G566200.1	TaGA20ox-D1	5D	segmental duplication
TraesCS6A02G221900.1	TaGA2ox-A9	6A	TraesCS6B02G259200.1	TaGA2ox-B9	6B	segmental duplication
TraesCS6A02G221900.1	TaGA2ox-A9	6A	TraesCS6D02G213100.1	TaGA2ox-D9	6D	segmental duplication
TraesCS6B02G259200.1	TaGA2ox-B9	6B	TraesCS6D02G213100.1	TaGA2ox-D9	6D	segmental duplication
TraesCS7A02G450000.1	TaGA2ox-A2	7A	TraesCS7B02G349700.1	TaGA2ox-B2	7B	segmental duplication
TraesCS7A02G450000.1	TaGA2ox-A2	7A	TraesCS7D02G439200.1	TaGA2ox-D2	7D	segmental duplication
TraesCS7B02G349700.1	TaGA2ox-B2	7B	TraesCS7D02G439200.1	TaGA2ox-D2	7D	segmental duplication
TraesCS1A02G392500.1	TaGA2ox-A8	1A	TraesCS1A02G392600.1	TaGA2ox-A16	1A	tandem duplication
TraesCS1B02G420700.1	TaGA2ox-B15	1B	TraesCS1B02G420800.1	TaGA2ox-B8	1B	tandem duplication
TraesCS1B02G420800.1	TaGA2ox-B8	1B	TraesCS1B02G420900.1	TaGA2ox-B16	1B	tandem duplication
TraesCS1D02G400700.1	TaGA2ox-D8	1D	TraesCS1D02G400800.1	TaGA2ox-D16	1D	tandem duplication
TraesCS2B02G570800.2	TaGA1ox-B1	2B	TraesCS2B02G570900.1	TaGA3ox-B1	2B	tandem duplication
TraesCS3D02G393900.1	TaGA20ox-D3-2	3D	TraesCS3D02G394000.1	TaGA20ox-D3-1	3D	tandem duplication
TraesCS4B02G376100.1	TaGA2ox-B13	4B	TraesCS4B02G376200.1	TaGA2ox-B12	4B	tandem duplication
