# Supplementary material for: Wheat gibberellin oxidase genes and their functions in regulating tillering
Source: PeerJ. 2023 Sep 1;11:e15924. doi: 10.7717/peerj.15924 (PMC10476609; doi:10.7717/peerj.15924)
Supplement: Supplemental Information 10 [file peerj-11-15924-s010.xlsx]

## Sheet: Table S6
Supplementary Table S6 One-to-one orthologous relationships of TaGAoxs
TaGAoxgene id	TaGAoxgene name	Chromosome	TaGAoxgene id	GAoxgene name	Chromosome	Ka	Ks	Ka/Ks	Selection pressure
TraesCS1A02G263600.1	TaGA20ox-A4	1A	TraesCS1B02G274200.1	TaGA20ox-B4	1B	0.0193633	0.0644464	0.300455	Purifying selection
TraesCS1A02G334400.1	TaGA2ox-A4	1A	TraesCS1B02G347600.1	TaGA2ox-B4	1B	0.0224354	0.0708887	0.316487	Purifying selection
TraesCS1A02G392500.1	TaGA2ox-A8	1A	TraesCS1B02G420700.1	TaGA2ox-B15	1B	0.172029	0.165891	1.037	positive selection
TraesCS1A02G126400.1	TaGA2ox-A10	1A	TraesCS1B02G145600.1	TaGA2ox-B10	1B	0.022287	0.0714378	0.311977	Purifying selection
TraesCS1A02G106200.1	TaGA2ox-A1	1A	TraesCS1B02G123500.1	TaGA2ox-B1	1B	0.015232	0.0554484	0.274707	Purifying selection
TraesCS1A02G392500.1	TaGA2ox-A8	1A	TraesCS1D02G400700.1	TaGA2ox-D8	1D	0.0187611	0.0785149	0.238949	Purifying selection
TraesCS1A02G263600.1	TaGA20ox-A4	1A	TraesCS1D02G263700.1	TaGA20ox-D4	1D	0.0159067	0.0680353	0.2338	Purifying selection
TraesCS1A02G334400.1	TaGA2ox-A4	1A	TraesCS1D02G336900.1	TaGA2ox-D4	1D	0.0181501	0.0505494	0.359057	Purifying selection
TraesCS1A02G126400.1	TaGA2ox-A10	1A	TraesCS1D02G127000.1	TaGA2ox-D10	1D	0.0183696	0.0675879	0.271788	Purifying selection
TraesCS1A02G106200.1	TaGA2ox-A1	1A	TraesCS1D02G108800.1	TaGA2ox-D1	1D	0.0109325	0.0426024	0.256616	Purifying selection
TraesCS1A02G334400.1	TaGA2ox-A4	1A	TraesCS3B02G328700.1	TaGA2ox-B3	3B	0.201466	0.512491	0.393111	Purifying selection
TraesCS1A02G263600.1	TaGA20ox-A4	1A	TraesCS3D02G401400.1	TaGA20ox-D2	3D	0.246144	0.487056	0.505371	Purifying selection
TraesCS1A02G334400.1	TaGA2ox-A4	1A	TraesCS3D02G293800.1	TaGA2ox-D3	3D	0.205005	0.460475	0.445203	Purifying selection
TraesCS1B02G274200.1	TaGA20ox-B4	1B	TraesCS1D02G263700.1	TaGA20ox-D4	1D	0.0187338	0.0522234	0.358724	Purifying selection
TraesCS1B02G347600.1	TaGA2ox-B4	1B	TraesCS1D02G336900.1	TaGA2ox-D4	1D	0.0176279	0.0490432	0.359437	Purifying selection
TraesCS1B02G420700.1	TaGA2ox-B15	1B	TraesCS1D02G400700.1	TaGA2ox-D8	1D	0.145899	0.155537	0.93804	Purifying selection
TraesCS1B02G123500.1	TaGA2ox-B1	1B	TraesCS1D02G108800.1	TaGA2ox-D1	1D	0.0164657	0.0554318	0.297045	Purifying selection
TraesCS1B02G145600.1	TaGA2ox-B10	1B	TraesCS1D02G127000.1	TaGA2ox-D10	1D	0.0210263	0.0715725	0.293777	Purifying selection
TraesCS1B02G347600.1	TaGA2ox-B4	1B	TraesCS3A02G294000.1	TaGA2ox-A3	3A	0.21018	0.473625	0.443769	Purifying selection
TraesCS1B02G347600.1	TaGA2ox-B4	1B	TraesCS3B02G328700.1	TaGA2ox-B3	3B	0.211161	0.507431	0.416138	Purifying selection
TraesCS1D02G336900.1	TaGA2ox-D4	1D	TraesCS3A02G294000.1	TaGA2ox-A3	3A	0.202322	0.449187	0.450419	Purifying selection
TraesCS1D02G336900.1	TaGA2ox-D4	1D	TraesCS3B02G328700.1	TaGA2ox-B3	3B	0.203288	0.481835	0.421903	Purifying selection
TraesCS1D02G336900.1	TaGA2ox-D4	1D	TraesCS3D02G293800.1	TaGA2ox-D3	3D	0.206029	0.434547	0.474124	Purifying selection
TraesCS2A02G379000.1	TaGA2ox-A6	2A	TraesCS2B02G396000.1	TaGA2ox-B6	2B	0.0185596	0.0496206	0.374029	Purifying selection
TraesCS2A02G540400.1	TaGA3ox-A1	2A	TraesCS2B02G570800.2	TaGA1ox-B1	2B	0.154871	0.369525	0.419108	Purifying selection
TraesCS2A02G379000.1	TaGA2ox-A6	2A	TraesCS2D02G375300.1	TaGA2ox-D6	2D	0.0174608	0.0342482	0.509831	Purifying selection
TraesCS2A02G540400.1	TaGA3ox-A1	2A	TraesCS2D02G542100.1	TaGA3ox-D1	2D	0.0414197	0.0695115	0.595868	Purifying selection
TraesCS2A02G379000.1	TaGA2ox-A6	2A	TraesCS6A02G221900.1	TaGA2ox-A9	6A	0.193011	0.555727	0.347313	Purifying selection
TraesCS2A02G379000.1	TaGA2ox-A6	2A	TraesCS6B02G259200.1	TaGA2ox-B9	6B	0.186906	0.520829	0.358862	Purifying selection
TraesCS2A02G379000.1	TaGA2ox-A6	2A	TraesCS6D02G213100.1	TaGA2ox-D9	6D	0.187694	0.531363	0.353232	Purifying selection
TraesCS2B02G396000.1	TaGA2ox-B6	2B	TraesCS2D02G375300.1	TaGA2ox-D6	2D	0.021847	0.0644298	0.339081	Purifying selection
TraesCS2B02G570800.2	TaGA1ox-B1	2B	TraesCS2D02G542100.1	TaGA3ox-D1	2D	0.16604	0.398464	0.4167	Purifying selection
TraesCS2D02G375300.1	TaGA2ox-D6	2D	TraesCS6A02G221900.1	TaGA2ox-A9	6A	0.182717	0.56993	0.320595	Purifying selection
TraesCS2D02G375300.1	TaGA2ox-D6	2D	TraesCS6B02G259200.1	TaGA2ox-B9	6B	0.186996	0.527037	0.354806	Purifying selection
TraesCS2D02G375300.1	TaGA2ox-D6	2D	TraesCS6D02G213100.1	TaGA2ox-D9	6D	0.177394	0.544799	0.325614	Purifying selection
TraesCS3A02G399800.1	TaGA20ox-A3	3A	TraesCS3B02G432800.1	TaGA20ox-B3	3B	0.0240959	0.0731113	0.329578	Purifying selection
TraesCS3A02G406200.1	TaGA20ox-A2	3A	TraesCS3B02G439900.1	TaGA20ox-B2	3B	0.0229673	0.0753969	0.304618	Purifying selection
TraesCS3A02G122600.1	TaGA3ox-A2	3A	TraesCS3B02G141800.1	TaGA3ox-B2	3B	0.0165837	0.0759205	0.218436	Purifying selection
TraesCS3A02G294000.1	TaGA2ox-A3	3A	TraesCS3B02G328700.1	TaGA2ox-B3	3B	0.0124312	0.0808146	0.153824	Purifying selection
TraesCS3A02G537300.2	TaGA2ox-A5	3A	TraesCS3B02G603000.1	TaGA2ox-B5	3B	0.155817	0.314518	0.495416	Purifying selection
TraesCS3A02G133400.1	TaGA2ox-A7	3A	TraesCS3B02G166100.1	TaGA2ox-B7	3B	0.0286138	0.0724833	0.394764	Purifying selection
TraesCS3A02G399800.1	TaGA20ox-A3	3A	TraesCS3D02G393900.1	TaGA20ox-D3-2	3D	0.0177918	0.0613172	0.29016	Purifying selection
TraesCS3A02G406200.1	TaGA20ox-A2	3A	TraesCS3D02G401400.1	TaGA20ox-D2	3D	0.0146884	0.0508923	0.288616	Purifying selection
TraesCS3A02G122600.1	TaGA3ox-A2	3A	TraesCS3D02G124500.1	TaGA3ox-D2	3D	0.00731267	0.0358706	0.203863	Purifying selection
TraesCS3A02G294000.1	TaGA2ox-A3	3A	TraesCS3D02G293800.1	TaGA2ox-D3	3D	0.0110398	0.0371977	0.296786	Purifying selection
TraesCS3A02G537300.2	TaGA2ox-A5	3A	TraesCS3D02G542800.1	TaGA2ox-D5	3D	0.13995	0.257568	0.543351	Purifying selection
TraesCS3A02G133400.1	TaGA2ox-A7	3A	TraesCS3D02G149600.1	TaGA2ox-D7	3D	0.024431	0.0528853	0.461962	Purifying selection
TraesCS3B02G328700.1	TaGA2ox-B3	3B	TraesCS3D02G293800.1	TaGA2ox-D3	3D	0.00688236	0.0586482	0.11735	Purifying selection
TraesCS3B02G432800.1	TaGA20ox-B3	3B	TraesCS3D02G393900.1	TaGA20ox-D3-2	3D	0.0228831	0.069999	0.326907	Purifying selection
TraesCS3B02G439900.1	TaGA20ox-B2	3B	TraesCS3D02G401400.1	TaGA20ox-D2	3D	0.015364	0.0404138	0.380168	Purifying selection
TraesCS3B02G141800.1	TaGA3ox-B2	3B	TraesCS3D02G124500.1	TaGA3ox-D2	3D	0.0116317	0.0643185	0.180845	Purifying selection
TraesCS3B02G603000.1	TaGA2ox-B5	3B	TraesCS3D02G542800.1	TaGA2ox-D5	3D	0.0638297	0.170355	0.374686	Purifying selection
TraesCS3B02G166100.1	TaGA2ox-B7	3B	TraesCS3D02G149600.1	TaGA2ox-D7	3D	0.0175723	0.0606774	0.289602	Purifying selection
TraesCS4A02G033200.1	TaGA2ox-A11	4A	TraesCS4B02G272100.1	TaGA2ox-B11	4B	0.0440938	0.140655	0.31349	Purifying selection
TraesCS4A02G234100.1	TaGA7ox-D1	4A	TraesCS4D02G079900.1	TaGA7ox-D1	4D	0.0139953	0.0799074	0.175144	Purifying selection
TraesCS4A02G033200.1	TaGA2ox-A11	4A	TraesCS4D02G271300.1	TaGA2ox-D11	4D	0.0395601	0.111352	0.355271	Purifying selection
TraesCS4A02G319100.1	TaGA20ox-A1	4A	TraesCS5B02G560300.1	TaGA20ox-B1	5B	0.0110737	0.151962	0.0728714	Purifying selection
TraesCS4A02G319100.1	TaGA20ox-A1	4A	TraesCS5D02G566200.1	TaGA20ox-D1	5D	0.0124523	0.149335	0.083385	Purifying selection
TraesCS4B02G272100.1	TaGA2ox-B11	4B	TraesCS4D02G271300.1	TaGA2ox-D11	4D	0.0239015	0.0928511	0.257418	Purifying selection
TraesCS4B02G376100.1	TaGA2ox-B13	4B	TraesCS5A02G543100.1	TaGA2ox-A14	5A	0.0734428	0.206041	0.356448	Purifying selection
TraesCS5B02G560300.1	TaGA20ox-B1	5B	TraesCS5D02G566200.1	TaGA20ox-D1	5D	0.00932268	0.120734	0.0772167	Purifying selection
TraesCS6A02G221900.1	TaGA2ox-A9	6A	TraesCS6B02G259200.1	TaGA2ox-B9	6B	0.00774534	0.0553611	0.139906	Purifying selection
TraesCS6A02G221900.1	TaGA2ox-A9	6A	TraesCS6D02G213100.1	TaGA2ox-D9	6D	0.00905379	0.0389951	0.232177	Purifying selection
TraesCS6B02G259200.1	TaGA2ox-B9	6B	TraesCS6D02G213100.1	TaGA2ox-D9	6D	0.00645721	0.0310122	0.208215	Purifying selection
TraesCS7A02G450000.1	TaGA2ox-A2	7A	TraesCS7B02G349700.1	TaGA2ox-B2	7B	0.0241794	0.165389	0.146197	Purifying selection
TraesCS7A02G450000.1	TaGA2ox-A2	7A	TraesCS7D02G439200.1	TaGA2ox-D2	7D	0.0146476	0.112661	0.130015	Purifying selection
TraesCS7B02G349700.1	TaGA2ox-B2	7B	TraesCS7D02G439200.1	TaGA2ox-D2	7D	0.02749	0.166222	0.165381	Purifying selection
TraesCS1A02G392500.1	TaGA2ox-A8	1A	TraesCS1A02G392600.1	TaGA2ox-A16	1A	0.0705069	0.184141	0.382897	Purifying selection
TraesCS1B02G420700.1	TaGA2ox-B15	1B	TraesCS1B02G420800.1	TaGA2ox-B8	1B	0.158227	0.179199	0.882967	Purifying selection
TraesCS1B02G420800.1	TaGA2ox-B8	1B	TraesCS1B02G420900.1	TaGA2ox-B16	1B	0.07833	0.158172	0.495219	Purifying selection
TraesCS1D02G400700.1	TaGA2ox-D8	1D	TraesCS1D02G400800.1	TaGA2ox-D16	1D	0.0681458	0.149256	0.456569	Purifying selection
TraesCS2B02G570800.2	TaGA1ox-B1	2B	TraesCS2B02G570900.1	TaGA3ox-B1	2B	0.134008	0.307906	0.435226	Purifying selection
TraesCS3D02G393900.1	TaGA20ox-D3-2	3D	TraesCS3D02G394000.1	TaGA20ox-D3-1	3D	0.0242214	0.0655523	0.369497	Purifying selection
TraesCS4B02G376100.1	TaGA2ox-B13	4B	TraesCS4B02G376200.1	TaGA2ox-B12	4B	0.0811232	0.213952	0.379165	Purifying selection
