# Supplementary material for: Wheat gibberellin oxidase genes and their functions in regulating tillering
Source: PeerJ. 2023 Sep 1;11:e15924. doi: 10.7717/peerj.15924 (PMC10476609; doi:10.7717/peerj.15924)
Supplement: Supplemental Information 11 [file peerj-11-15924-s011.xlsx]

## Sheet: Table S7
Supplementary Table S7 One-to-one orthologous relationships of GAoxs between wheat and other species
TaGAox gene id	TaGAox gene name	Chromosome	GAox gene id	GAox gene name	Chromosome	Ka	Ks	Ka/Ks	Selection pressure
TraesCS1A02G334400.1	TaGA2ox-A4	1A	Zm00001d038695_T001	ZmGA2ox9	6	0.133496	0.355962	0.375028	Purifying selection
TraesCS1A02G392500.1	TaGA2ox-A8	1A	Zm00001d038996_T001	ZmGA2ox10	6	0.198636	0.378668	0.524566	Purifying selection
TraesCS1A02G106200.1	TaGA2ox-A1	1A	Zm00001d037565_T002	ZmGA2ox7	6	0.136434	0.467005	0.292148	Purifying selection
TraesCS1A02G263600.1	TaGA20ox-A4	1A	Zm00001d012212_T001	ZmGA20ox10	8	0.224886	0.459893	0.488995	Purifying selection
TraesCS1B02G347600.1	TaGA2ox-B4	1B	Zm00001d038695_T001	ZmGA2ox9	6	0.144431	0.343672	0.42026	Purifying selection
TraesCS1B02G420700.1	TaGA2ox-B15	1B	Zm00001d038996_T001	ZmGA2ox10	6	0.315572	0.46029	0.685594	Purifying selection
TraesCS1B02G123500.1	TaGA2ox-B1	1B	Zm00001d037565_T002	ZmGA2ox7	6	0.133467	0.474085	0.281525	Purifying selection
TraesCS1B02G274200.1	TaGA20ox-B4	1B	Zm00001d012212_T001	ZmGA20ox10	8	0.242258	0.527193	0.459524	Purifying selection
TraesCS1D02G336900.1	TaGA2ox-D4	1D	Zm00001d038695_T001	ZmGA2ox9	6	0.133564	0.349315	0.382359	Purifying selection
TraesCS1D02G400700.1	TaGA2ox-D8	1D	Zm00001d038996_T001	ZmGA2ox10	6	0.201986	0.356194	0.567068	Purifying selection
TraesCS1D02G108800.1	TaGA2ox-D1	1D	Zm00001d037565_T002	ZmGA2ox7	6	0.137923	0.487042	0.283185	Purifying selection
TraesCS1D02G263700.1	TaGA20ox-D4	1D	Zm00001d012212_T001	ZmGA20ox10	8	0.239639	0.509671	0.470183	Purifying selection
TraesCS2A02G379000.1	TaGA2ox-A6	2A	Zm00001d017294_T001	ZmGA2ox5	5	0.202139	0.507075	0.398636	Purifying selection
TraesCS2B02G396000.1	TaGA2ox-B6	2B	Zm00001d017294_T001	ZmGA2ox5	5	0.220546	0.503172	0.43831	Purifying selection
TraesCS2D02G375300.1	TaGA2ox-D6	2D	Zm00001d017294_T001	ZmGA2ox5	5	0.209742	0.468204	0.447971	Purifying selection
TraesCS3A02G294000.1	TaGA2ox-A3	3A	Zm00001d038695_T001	ZmGA2ox9	6	0.181315	0.415	0.436905	Purifying selection
TraesCS3A02G406200.1	TaGA20ox-A2	3A	Zm00001d012212_T001	ZmGA20ox10	8	0.128963	0.327778	0.393445	Purifying selection
TraesCS3A02G133400.1	TaGA2ox-A7	3A	Zm00001d008909_T002	ZmGA2ox11	8	0.146678	0.265408	0.552652	Purifying selection
TraesCS3B02G328700.1	TaGA2ox-B3	3B	Zm00001d038695_T001	ZmGA2ox9	6	0.183035	0.435984	0.419821	Purifying selection
TraesCS3B02G439900.1	TaGA20ox-B2	3B	Zm00001d012212_T001	ZmGA20ox10	8	0.131328	0.271435	0.483829	Purifying selection
TraesCS3B02G166100.1	TaGA2ox-B7	3B	Zm00001d008909_T002	ZmGA2ox11	8	0.153682	0.31368	0.489932	Purifying selection
TraesCS3D02G293800.1	TaGA2ox-D3	3D	Zm00001d038695_T001	ZmGA2ox9	6	0.180386	0.425601	0.423838	Purifying selection
TraesCS3D02G401400.1	TaGA20ox-D2	3D	Zm00001d012212_T001	ZmGA20ox10	8	0.122209	0.277553	0.440309	Purifying selection
TraesCS3D02G149600.1	TaGA2ox-D7	3D	Zm00001d008909_T002	ZmGA2ox11	8	0.150961	0.2953	0.511214	Purifying selection
TraesCS4A02G234100.1	TaGA7ox-A1	4A	Zm00001d013725_T002	ZmGA20ox9	5	0.185944	0.57426	0.323798	Purifying selection
TraesCS4D02G079900.1	TaGA7ox-D1	4D	Zm00001d013725_T002	ZmGA20ox9	5	0.184843	0.599273	0.308445	Purifying selection
TraesCS4A02G319100.1	TaGA20ox-A1	4A	Zm00001d034898_T001	ZmGA20ox3	1	0.181207	0.421078	0.430342	Purifying selection
TraesCS5B02G560300.1	TaGA20ox-B1	5B	Zm00001d034898_T001	ZmGA20ox3	1	0.177409	0.405086	0.437955	Purifying selection
TraesCS2A02G379000.1	TaGA2ox-A6	2A	Zm00001d002999_T001	ZmGA2ox1	2	0.158557	0.342372	0.463114	Purifying selection
TraesCS2B02G396000.1	TaGA2ox-B6	2B	Zm00001d002999_T001	ZmGA2ox1	2	0.169144	0.381099	0.443833	Purifying selection
TraesCS2D02G375300.1	TaGA2ox-D6	2D	Zm00001d002999_T001	ZmGA2ox1	2	0.167598	0.350267	0.478487	Purifying selection
TraesCS6A02G221900.1	TaGA2ox-A9	6A	Zm00001d002999_T001	ZmGA2ox1	2	0.211874	0.55291	0.383197	Purifying selection
TraesCS6B02G259200.1	TaGA2ox-B9	6B	Zm00001d002999_T001	ZmGA2ox1	2	0.209316	0.540546	0.38723	Purifying selection
TraesCS6D02G213100.1	TaGA2ox-D9	6D	Zm00001d002999_T001	ZmGA2ox1	2	0.206974	0.565794	0.365812	Purifying selection
TraesCS3A02G406200.1	TaGA20ox-A2	3A	Zm00001d042611_T001	ZmGA20ox6	3	0.0845344	0.286527	0.295031	Purifying selection
TraesCS3A02G122600.1	TaGA3ox-A2	3A	Zm00001d039634_T001	ZmGA3ox1	3	0.113354	0.29937	0.378642	Purifying selection
TraesCS3A02G133400.1	TaGA2ox-A7	3A	Zm00001d039394_T001	ZmGA2ox2	3	0.153447	0.245852	0.624146	Purifying selection
TraesCS3B02G439900.1	TaGA20ox-B2	3B	Zm00001d042611_T001	ZmGA20ox6	3	0.0890711	0.276006	0.322714	Purifying selection
TraesCS3B02G141800.1	TaGA3ox-B2	3B	Zm00001d039634_T001	ZmGA3ox1	3	0.114199	0.30211	0.378004	Purifying selection
TraesCS3B02G166100.1	TaGA2ox-B7	3B	Zm00001d039394_T001	ZmGA2ox2	3	0.15896	0.283014	0.561669	Purifying selection
TraesCS3D02G401400.1	TaGA20ox-D2	3D	Zm00001d042611_T001	ZmGA20ox6	3	0.106376	0.260305	0.40866	Purifying selection
TraesCS3D02G149600.1	TaGA2ox-D7	3D	Zm00001d039394_T001	ZmGA2ox2	3	0.154402	0.298249	0.517696	Purifying selection
TraesCS3D02G124500.1	TaGA3ox-D2	3D	Zm00001d039634_T001	ZmGA3ox1	3	0.119196	0.280681	0.424666	Purifying selection
TraesCS3D02G293800.1	TaGA2ox-D3	3D	Zm00001d043411_T001	ZmGA2ox4	3	0.0965539	0.338703	0.28507	Purifying selection
TraesCS6A02G221900.1	TaGA2ox-A9	6A	Zm00001d017294_T001	ZmGA2ox5	5	0.124865	0.406989	0.306801	Purifying selection
TraesCS6B02G259200.1	TaGA2ox-B9	6B	Zm00001d017294_T001	ZmGA2ox5	5	0.119316	0.404484	0.294984	Purifying selection
TraesCS6D02G213100.1	TaGA2ox-D9	6D	Zm00001d017294_T001	ZmGA2ox5	5	0.116427	0.415815	0.279997	Purifying selection
TraesCS1A02G334400.1	TaGA2ox-A4	1A	Os05t0514600-01	OsGA2ox4	5	0.16581	0.345887	0.479375	Purifying selection
TraesCS1A02G392500.1	TaGA2ox-A8	1A	Os05t0560900-02	OsGA2ox8	5	0.193755	0.441404	0.438953	Purifying selection
TraesCS1A02G106200.1	TaGA2ox-A1	1A	Os05t0158600-02	OsGA2ox1	5	0.146588	0.403713	0.363101	Purifying selection
TraesCS1B02G347600.1	TaGA2ox-B4	1B	Os05t0514600-01	OsGA2ox4	5	0.157595	0.382008	0.412544	Purifying selection
TraesCS1B02G420700.1	TaGA2ox-B15	1B	Os05t0560900-02	OsGA2ox8	5	0.294194	0.461757	0.637118	Purifying selection
TraesCS1B02G123500.1	TaGA2ox-B1	1B	Os05t0158600-02	OsGA2ox1	5	0.142329	0.433144	0.328594	Purifying selection
TraesCS1D02G336900.1	TaGA2ox-D4	1D	Os05t0514600-01	OsGA2ox4	5	0.166986	0.3691	0.452414	Purifying selection
TraesCS1D02G400700.1	TaGA2ox-D8	1D	Os05t0560900-02	OsGA2ox8	5	0.185847	0.385092	0.482605	Purifying selection
TraesCS1D02G108800.1	TaGA2ox-D1	1D	Os05t0158600-02	OsGA2ox1	5	0.144652	0.417769	0.346249	Purifying selection
TraesCS2A02G379000.1	TaGA2ox-A6	2A	Os04t0522500-01	OsGA2ox6	4	0.0965927	0.351835	0.27454	Purifying selection
TraesCS2B02G396000.1	TaGA2ox-B6	2B	Os04t0522500-01	OsGA2ox6	4	0.105	0.373379	0.281216	Purifying selection
TraesCS2D02G375300.1	TaGA2ox-D6	2D	Os04t0522500-01	OsGA2ox6	4	0.0874897	0.347107	0.252054	Purifying selection
TraesCS3A02G406200.1	TaGA20ox-A2	3A	Os05t0421900-00	OsGA20ox4	5	0.205841	0.430134	0.47855	Purifying selection
TraesCS3A02G122600.1	TaGA3ox-A2	3A	Os05t0178100-01	OsGA3ox1	5	0.333001	0.533879	0.623738	Purifying selection
TraesCS3B02G439900.1	TaGA20ox-B2	3B	Os05t0421900-00	OsGA20ox4	5	0.208902	0.421668	0.495418	Purifying selection
TraesCS3B02G328700.1	TaGA2ox-B3	3B	Os05t0514600-01	OsGA2ox4	5	0.210307	0.76918	0.273417	Purifying selection
TraesCS3B02G141800.1	TaGA3ox-B2	3B	Os05t0178100-01	OsGA3ox1	5	0.333583	0.524949	0.635459	Purifying selection
TraesCS3D02G401400.1	TaGA20ox-D2	3D	Os05t0421900-00	OsGA20ox4	5	0.196409	0.448846	0.437586	Purifying selection
TraesCS3D02G124500.1	TaGA3ox-D2	3D	Os05t0178100-01	OsGA3ox1	5	0.327486	0.525315	0.623409	Purifying selection
TraesCS3D02G293800.1	TaGA2ox-D3	3D	Os05t0514600-01	OsGA2ox4	5	0.207768	0.674136	0.308199	Purifying selection
TraesCS3A02G122600.1	TaGA3ox-A2	3A	Os01t0177400-01	OsGA3ox2	1	0.145584	0.311837	0.466859	Purifying selection
TraesCS3A02G406200.1	TaGA20ox-A2	3A	Os01t0883800-02	OsGA20ox2	1	0.115695	0.379445	0.304905	Purifying selection
TraesCS3A02G133400.1	TaGA2ox-A7	3A	Os01t0209700-01	OsGA2ox7	1	0.145069	0.25733	0.563746	Purifying selection
TraesCS3B02G166100.1	TaGA2ox-B7	3B	Os01t0209700-01	OsGA2ox7	1	0.1421	0.255871	0.555358	Purifying selection
TraesCS3B02G439900.1	TaGA20ox-B2	3B	Os01t0883800-02	OsGA20ox2	1	0.115949	0.345102	0.335985	Purifying selection
TraesCS3B02G141800.1	TaGA3ox-B2	3B	Os01t0177400-01	OsGA3ox2	1	0.152212	0.323957	0.469852	Purifying selection
TraesCS3D02G149600.1	TaGA2ox-D7	3D	Os01t0757200-01	OsGA2ox3	1	0.333769	0.562196	0.593687	Purifying selection
TraesCS3D02G124500.1	TaGA3ox-D2	3D	Os01t0177400-01	OsGA3ox2	1	0.141071	0.285633	0.49389	Purifying selection
TraesCS3D02G401400.1	TaGA20ox-D2	3D	Os01t0883800-02	OsGA20ox2	1	0.117712	0.363334	0.323976	Purifying selection
TraesCS3D02G149600.1	TaGA2ox-D7	3D	Os01t0209700-01	OsGA2ox7	1	0.142757	0.248905	0.573539	Purifying selection
TraesCS2A02G379000.1	TaGA2ox-A6	2A	Os02t0630300-01	OsGA2ox9	2	0.236904	0.4665	0.507833	Purifying selection
TraesCS2B02G396000.1	TaGA2ox-B6	2B	Os02t0630300-01	OsGA2ox9	2	0.254164	0.491831	0.516771	Purifying selection
TraesCS2D02G375300.1	TaGA2ox-D6	2D	Os02t0630300-01	OsGA2ox9	2	0.243904	0.470822	0.518038	Purifying selection
TraesCS6A02G221900.1	TaGA2ox-A9	6A	Os02t0630300-01	OsGA2ox9	2	0.147033	0.403054	0.364797	Purifying selection
TraesCS6B02G259200.1	TaGA2ox-B9	6B	Os02t0630300-01	OsGA2ox9	2	0.145986	0.415847	0.351058	Purifying selection
TraesCS6D02G213100.1	TaGA2ox-D9	6D	Os02t0630300-01	OsGA2ox9	2	0.143319	0.409733	0.349786	Purifying selection
TraesCS4A02G319100.1	TaGA20ox-A1	4A	Os03t0856700-02	OsGA20ox1	3	0.191605	0.525037	0.364936	Purifying selection
TraesCS4A02G234100.1	TaGA7ox-A1	4A	Os03t0618300-01	OsGA20ox5	3	0.0829352	0.291619	0.284395	Purifying selection
TraesCS4D02G079900.1	TaGA7ox-D1	4D	Os03t0618300-01	OsGA20ox5	3	0.0807446	0.289603	0.278811	Purifying selection
TraesCS5B02G560300.1	TaGA20ox-B1	5B	Os03t0856700-02	OsGA20ox1	3	0.191665	0.588345	0.325771	Purifying selection
TraesCS6A02G221900.1	TaGA2ox-A9	6A	Os04t0522500-01	OsGA2ox6	4	0.205609	0.604831	0.339945	Purifying selection
TraesCS6B02G259200.1	TaGA2ox-B9	6B	Os04t0522500-01	OsGA2ox6	4	0.211525	0.597374	0.354091	Purifying selection
TraesCS6D02G213100.1	TaGA2ox-D9	6D	Os04t0522500-01	OsGA2ox6	4	0.199334	0.608438	0.327617	Purifying selection
