# Supplementary material for: Wheat gibberellin oxidase genes and their functions in regulating tillering
Source: PeerJ. 2023 Sep 1;11:e15924. doi: 10.7717/peerj.15924 (PMC10476609; doi:10.7717/peerj.15924)
Supplement: Supplemental Information 12 [file peerj-11-15924-s012.xlsx]

## Sheet: Table S8
Supplementary Table S8 The expression levels of TaGAox genes in WT (T01, T02 and T03) and dmc (T04, T05 and T06)
Gene name	Gene ID	T01	T02	T03	T04	T05	T06
TraesCS1A02G263600.1	TaGA20ox-A4	0.141307	0.256113	0.251039	0.863676	1.42961	0.739042
TraesCS1B02G274200.1	TaGA20ox-B4	0	0.01035	0.035042	0.036136	0	0
TraesCS1D02G263700.1	TaGA20ox-D4	0.113571	0.396526	0.171082	0.453089	0.44703	0.324672
TraesCS3A02G399800.1	TaGA20ox-A3	0	0	0	0	0	0
TraesCS3B02G432800.1	TaGA20ox-B3	0	0	0	0	0	0
TraesCS3D02G393900.1	TaGA20ox-D3-2	0	0	0	0	0	0
TraesCS3D02G394000.1	TaGA20ox-D3-1	0	0	0.040109	0	0.094152	0
TraesCS3A02G406200.1	TaGA20ox-A2	1.49839	1.83967	1.21834	0.575781	0.535838	0.366418
TraesCS3B02G439900.1	TaGA20ox-B2	2.18391	2.24602	2.39702	0.807351	1.06963	0.726124
TraesCS3D02G401400.1	TaGA20ox-D2	0.598333	0.469616	0.437993	0.279158	0.297409	0.150784
TraesCS3D02G074300.2	TaGA7ox-D2	0.013924	0	0	0.049919	0.13051	0.082199
TraesCS4A02G234100.1	TaGA7ox-A1	1.35281	2.95615	1.0712	0.778579	0.842907	1.00212
TraesCS4D02G079900.1	TaGA7ox-D1	0.27268	0.458893	0.262975	0.494832	0.400457	0.362005
TraesCS4A02G319100.1	TaGA20ox-A1	1.74404	2.60624	2.37871	1.97933	2.20717	2.24111
TraesCS5B02G560300.1	TaGA20ox-B1	0.488591	0.582303	0.448674	0.722096	0.607383	0.745253
TraesCS5D02G566200.1	TaGA20ox-D1	4.22674	4.25576	3.7747	2.99248	2.7095	3.57499
TraesCS1A02G106200.1	TaGA2ox-A1	0.440534	0.553469	0.40018	0.303086	0.404149	0.376449
TraesCS1B02G123500.1	TaGA2ox-B1	0.705636	0.957349	0.71649	0.39953	0.418699	0.194665
TraesCS1D02G108800.1	TaGA2ox-D1	0.735828	0.388675	0.443239	0.381547	0.319765	0.199369
TraesCS1A02G126400.1	TaGA2ox-A10	0.024997	0.147558	0.168832	0.803921	0.861708	1.14286
TraesCS1B02G145600.1	TaGA2ox-B10	0.152512	0.413839	0.184218	0.975612	1.23607	0.896705
TraesCS1D02G127000.1	TaGA2ox-D10	0.083508	0.028665	0.053375	0.139502	0.746606	0.275778
TraesCS1A02G334400.1	TaGA2ox-A4	2.27978	2.37827	2.21402	2.31224	2.53937	0.933876
TraesCS1B02G347600.1	TaGA2ox-B4	0.834498	0.873722	0.619401	1.06154	1.5505	0.691981
TraesCS1D02G336900.1	TaGA2ox-D4	2.53364	2.81127	2.33323	2.62292	2.34034	1.43814
TraesCS1A02G392500.1	TaGA2ox-A8	0.120485	0.060114	0.069524	0.110771	0	0.109873
TraesCS1B02G420700.1	TaGA2ox-B15	0.104314	0.028059	0.055976	0.113736	0.121585	0.170749
TraesCS1B02G420800.1	TaGA2ox-B8	0.221819	0.219281	0.211507	0.668498	0.704835	0.413611
TraesCS1D02G400700.1	TaGA2ox-D8	0.190788	0.34226	0.344397	0.34585	0.445197	0.374318
TraesCS1A02G392600.1	TaGA2ox-A16	0.232981	0.434425	0.260945	0.151237	0.044132	0.182663
TraesCS1B02G420900.1	TaGA2ox-B16	0	0	0.018891	0	0	0
TraesCS1D02G400800.1	TaGA2ox-D16	0.119991	0.057114	0.072507	0.047821	0.088626	0.038787
TraesCS2A02G379000.1	TaGA2ox-A6	0.099293	0.112274	0.07834	0.034505	0.086703	0
TraesCS2B02G396000.1	TaGA2ox-B6	0	0	0.115371	0.096925	0.183898	0.100588
TraesCS2D02G375300.1	TaGA2ox-D6	0.024964	0.049484	0.09636	0.142522	0.141444	0
TraesCS3A02G133400.1	TaGA2ox-A7	0.19592	0.29298	0.121966	0.087588	0.176117	0.031143
TraesCS3B02G166100.1	TaGA2ox-B7	0.91965	1.22125	0.685498	1.29941	1.32573	0.722417
TraesCS3D02G149600.1	TaGA2ox-D7	1.07509	0.602573	0.878617	0.275572	0.336605	0.162248
TraesCS3A02G294000.1	TaGA2ox-A3	0.549009	0.348562	0.686447	0.881509	0.894301	0.466169
TraesCS3B02G328700.1	TaGA2ox-B3	0.281696	0.212653	0.40346	0.801135	0.511703	0.566218
TraesCS3D02G293800.1	TaGA2ox-D3	0.390021	0.320614	0.780204	0.158615	0.541533	0.312957
TraesCS3A02G537300.2	TaGA2ox-A5	0.099973	0.060696	0.141346	0.381945	0.231626	0.345934
TraesCS3B02G603000.1	TaGA2ox-B5	0.072987	0.089992	0.090557	0.121021	0.303239	0.222476
TraesCS3D02G542800.1	TaGA2ox-D5	0.130363	0.042721	0.029174	0.189706	0.156309	0.086498
TraesCS4A02G033200.1	TaGA2ox-A11	0	0	0	0	0	0
TraesCS4B02G272100.1	TaGA2ox-B11	0	0	0	0	0.039918	0
TraesCS4D02G271300.1	TaGA2ox-D11	0.077258	0.11908	0.108126	0.088695	0.096506	0.03654
TraesCS4B02G376100.1	TaGA2ox-B13	0	0	0	0	0	0
TraesCS4B02G376200.1	TaGA2ox-B12	0	0	0	0	0	0
TraesCS5A02G543100.1	TaGA2ox-A14	0	0	0	0	0	0
TraesCS6A02G221900.1	TaGA2ox-A9	0.17545	0.202574	0.039692	0.114734	0.09978	0
TraesCS6B02G259200.1	TaGA2ox-B9	0.205264	0.163509	0.384119	0.151517	0.143297	0.070023
TraesCS6D02G213100.1	TaGA2ox-D9	0.241798	0.073204	0.076179	0.027733	0.043289	0
TraesCS7A02G450000.1	TaGA2ox-A2	0	0	0	0	0	0
TraesCS7B02G349700.1	TaGA2ox-B2	0	0	0	0	0	0
TraesCS7D02G439200.1	TaGA2ox-D2	0.012123	0	0	0	0	0
TraesCS2A02G540400.1	TaGA3ox-A1	0	0	0	0	0	0
TraesCS2B02G570800.2	TaGA1ox-B1	0.217497	0.084397	0.248571	0.012008	0.03215	0.133741
TraesCS2B02G570900.1	TaGA3ox-B1	0	0	0	0	0	0
TraesCS2D02G542100.1	TaGA3ox-D1	0	0	0	0	0	0
TraesCS3A02G122600.1	TaGA3ox-A2	2.88717	2.8158	2.90976	1.11606	1.63573	0.89222
TraesCS3B02G141800.1	TaGA3ox-B2	3.42581	3.52198	3.10041	4.07603	5.51474	3.80541
TraesCS3D02G124500.1	TaGA3ox-D2	4.11553	5.77796	5.07427	6.02251	7.97807	6.01385
