# Supplementary material for: Wheat gibberellin oxidase genes and their functions in regulating tillering
Source: PeerJ. 2023 Sep 1;11:e15924. doi: 10.7717/peerj.15924 (PMC10476609; doi:10.7717/peerj.15924)
Supplement: Supplemental Information 13 [file peerj-11-15924-s013.xlsx]

## Sheet: Table S9
Supplementary Table S9 Correlation Analysis of tiller number and gene relative expression level
	gene relative expression level	tiller number
WT	1.06081	6
OE_L299	23.1168	9
OE_L306	4.268	9
OE_L314	35.2638	9
OE_L331	23.2205	10
OE_L342	14.503	8
OE_L351	13.0981	8
OE_L358	14.6473	9
OE_L364	16.7738	8
OE_L367	11.0058	7
OE_L369	16.7095	8
Correlation Analysis
	gene elative expression level	tiller number
gene relative expression level	1
tiller number	0.613*	1
*: p<0.05

## Sheet: Sheet1
Supplementary Table S9 Average of number tillers and qRT-PCR analysis of TaGA7ox-A1-OE overexpression lines
Average tiller numbers of the transgenic plants and controls (WT) at different stages
Transgenic lines number	TN1	TN2	TN3	TN4	TN5	TN6
WT1	1	1	3	6	7	7
WT2	1	1	3	5	6	6
WT3	1	1	1	4	4	5
WT4	1	1	3	6	7	7
WT5	1	1	3	5	5	6
WT6	1	1	2	6	7	7
WT7	1	2	4	7	7	8
WT8	1	1	4	5	5	6
WT9	1	1	4	6	7	7
WT10	1	1	4	5	7	8
WT11	1	1	4	5	7	7
WT12	1	1	3	7	9	9
Average of number tillers	1	1.08333	3.16667	5.58333	6.5	6.91667
OE_L243	1	1	4	8	11	12
OE_L289	2	2	3	9	11	12
OE_L297	1	1	5	9	10	10
OE_L298	1	1	4	8	8	9
OE_L299	2	4	5	9	11	11
OE_L300	1	1	4	8	10	11
OE_L304	1	2	5	9	11	11
OE_L306	1	2	4	9	11	11
OE_L307	1	1	3	6	8	9
OE_L308	1	1	4	9	11	11
OE_L309	1	1	4	8	14	14
OE_L314	1	1	4	9	12	12
OE_L317	1	2	3	8	8	9
OE_L320	1	1	4	9	10	10
OE_L322	1	1	4	7	9	9
OE_L323	2	2	4	6	8	10
OE_L324	1	1	4	8	9	10
OE_L328	1	1	3	7	10	10
OE_L331	1	1	5	10	10	10
OE_L333	1	1	4	7	8	10
OE_L335	1	1	5	9	14	14
OE_L336	1	1	4	6	11	11
OE_L339	1	1	5	7	7	9
OE_L342	1	1	3	8	9	9
OE_L343	1	1	4	6	9	9
OE_L345	3	3	7	8	13	13
OE_L346	1	2	4	9	11	11
OE_L349	1	2	4	9	12	12
OE_L351	1	1	5	8	9	10
OE_L353	1	1	2	8	11	11
OE_L354	1	1	4	5	8	9
OE_L355	1	1	4	8	8	9
OE_L358	1	1	6	9	13	13
OE_L363	1	1	4	8	10	11
OE_L364	3	3	7	8	11	11
OE_L367	2	3	6	7	9	9
OE_L368	1	1	4	7	11	11
OE_L369	1	1	4	7	11	12
OE_L371	1	1	4	7	9	11
OE_L373	1	2	3	8	10	10
OE_L374	2	2	5	9	10	11
OE_L378	1	1	4	5	8	9
OE_L379	1	1	4	6	9	9
OE_L380	1	1	4	8	14	14
OE_L382	1	1	4	9	11	11
OE_L383	1	1	4	5	9	9
OE_L384	1	1	4	8	10	11
OE_L386	2	2	5	8	9	10
OE_L389	1	1	3	7	8	9
OE_L393	1	2	4	9	13	13
OE_L394	1	1	4	6	9	10
OE_L396	1	1	4	8	10	10
OE_L400	1	1	4	8	10	10
OE_L401	1	2	5	8	12	12
OE_L403	1	2	5	9	10	10
OE_L404	1	1	4	6	10	11
OE_L405	1	1	4	8	10	10
OE_L406	1	1	4	7	10	10
OE_L407	1	1	4	7	8	9
OE_L408	1	1	4	7	9	9
OE_L411	1	1	4	7	9	9
OE_L412	1	1	4	9	10	10
OE_L413	1	1	4	8	10	10
OE_L414	2	1	4	7	10	10
OE_L417	1	2	3	9	11	12
OE_L418	1	1	4	7	10	10
OE_L424	1	1	4	7	11	12
OE_L427	1	1	4	8	12	12
Average of number tillers	1.16176	1.33824	4.16176	7.72059	10.1176	10.5588
OE_L*：TN1-TN6: thetillering number statistics time points, the intervals were 7 days.
Correlation Analysis of tiller number and gene relative expression level
	Gene relative expression level	Tiller number (TN4)
WT	1.06081	6
OE_L299	23.1168	9
OE_L306	4.268	9
OE_L314	35.2638	9
OE_L331	23.2205	10
OE_L342	14.503	8
OE_L351	13.0981	8
OE_L358	14.6473	9
OE_L364	16.7738	8
OE_L367	11.0058	7
OE_L369	16.7095	8
Correlation Analysis
	Gene elative expression level	Tiller number
Gene relative expression level	1
Tiller number	0.613*	1
*: P<0.05
