# Supplementary material for: Wheat gibberellin oxidase genes and their functions in regulating tillering
Source: PeerJ journal article supplement (doi:10.7717/peerj.15924), 2023-09-01
Supplement: supplementary_file_1.zip [file Figure 7.xlsx]

## Sheet: 0
	Well	Fluor	Target	Content	Sample	Cq	SQ
	A01	SYBR	Actin	Unkn-01	301 0h	24.5036
	A02	SYBR	Actin	Unkn-01	301 0h	24.8412
	A03	SYBR	Actin	Unkn-01	301 0h	24.8982
	A04	SYBR	Actin	Unkn-02	301 1h	24.3033
	A05	SYBR	Actin	Unkn-02	301 1h	24.4651
	A06	SYBR	Actin	Unkn-02	301 1h	23.8044
	A07	SYBR	Actin	Unkn-03	301 2h	23.4223
	A08	SYBR	Actin	Unkn-03	301 2h	23.8852
	A09	SYBR	Actin	Unkn-03	301 2h	24.0854
	A10	SYBR	2ox-A16	Unkn-04	301 0h	34.0364
	A11	SYBR	2ox-A16	Unkn-04	301 0h	34.2357
	A12	SYBR	2ox-A16	Unkn-04	301 0h	33.9694
	B01	SYBR	Actin	Unkn-05	dmc oh	23.5639
	B02	SYBR	Actin	Unkn-05	dmc oh	23.9173
	B03	SYBR	Actin	Unkn-05	dmc oh	24.0124
	B04	SYBR	Actin	Unkn-06	dmc 1h	25.3485
	B05	SYBR	Actin	Unkn-06	dmc 1h	25.379
	B06	SYBR	Actin	Unkn-06	dmc 1h	25.229
	B07	SYBR	Actin	Unkn-07	dmc 2h	23.7605
	B08	SYBR	Actin	Unkn-07	dmc 2h	23.8711
	B09	SYBR	Actin	Unkn-07	dmc 2h	24.0615
	B10	SYBR	2ox-A16	Unkn-08	dmc oh	33.6294
	B11	SYBR	2ox-A16	Unkn-08	dmc oh	34.4464
	B12	SYBR	2ox-A16	Unkn-08	dmc oh	33.5173
	C01	SYBR	7ox-A1	Unkn-09	301 0h	29.6369
	C02	SYBR	7ox-A1	Unkn-09	301 0h	29.6107
	C03	SYBR	7ox-A1	Unkn-09	301 0h	29.3095
	C04	SYBR	7ox-A1	Unkn-10	301 1h	29.5062
	C05	SYBR	7ox-A1	Unkn-10	301 1h	29.4656
	C06	SYBR	7ox-A1	Unkn-10	301 1h	29.6426
	C07	SYBR	7ox-A1	Unkn-11	301 2h	28.3421
	C08	SYBR	7ox-A1	Unkn-11	301 2h	28.4371
	C09	SYBR	7ox-A1	Unkn-11	301 2h	28.7422
	C10	SYBR	2ox-A16	Unkn-12	301 1h	35.9502
	C11	SYBR	2ox-A16	Unkn-12	301 1h	35.3746
	C12	SYBR	2ox-A16	Unkn-12	301 1h	35.7434
	D01	SYBR	7ox-A1	Unkn-13	dmc oh	28.7803
	D02	SYBR	7ox-A1	Unkn-13	dmc oh	28.6523
	D03	SYBR	7ox-A1	Unkn-13	dmc oh	28.8445
	D04	SYBR	7ox-A1	Unkn-14	dmc 1h	30.0549
	D05	SYBR	7ox-A1	Unkn-14	dmc 1h	30.1661
	D06	SYBR	7ox-A1	Unkn-14	dmc 1h	30.1481
	D07	SYBR	7ox-A1	Unkn-15	dmc 2h	27.8478
	D08	SYBR	7ox-A1	Unkn-15	dmc 2h	27.8278
	D09	SYBR	7ox-A1	Unkn-15	dmc 2h	28.083
	D10	SYBR	2ox-A16	Unkn-16	dmc 1h	34.0437
	D11	SYBR	2ox-A16	Unkn-16	dmc 1h	33.2643
	D12	SYBR	2ox-A16	Unkn-16	dmc 1h	34.1597
	E01	SYBR	7ox-A1	Unkn-17	301 0h	31.765
	E02	SYBR	7ox-A1	Unkn-17	301 0h	31.4303
	E03	SYBR	7ox-A1	Unkn-17	301 0h	32.4133
	E04	SYBR	7ox-A1	Unkn-18	301 1h	30.6318
	E05	SYBR	7ox-A1	Unkn-18	301 1h	31.0006
	E06	SYBR	7ox-A1	Unkn-18	301 1h	30.6238
	E07	SYBR	7ox-A1	Unkn-19	301 2h	29.2471
	E08	SYBR	7ox-A1	Unkn-19	301 2h	29.3347
	E09	SYBR	7ox-A1	Unkn-19	301 2h	29.7988
	E10	SYBR	2ox-A16	Unkn-20	301 2h	34.2537
	E11	SYBR	2ox-A16	Unkn-20	301 2h	34.2224
	E12	SYBR	2ox-A16	Unkn-20	301 2h	34.1059
	F01	SYBR	7ox-A1	Unkn-21	dmc oh	31.4701
	F02	SYBR	7ox-A1	Unkn-21	dmc oh	31.4971
	F03	SYBR	7ox-A1	Unkn-21	dmc oh	30.7095
	F04	SYBR	7ox-A1	Unkn-22	dmc 1h	32.028
	F05	SYBR	7ox-A1	Unkn-22	dmc 1h	32.262
	F06	SYBR	7ox-A1	Unkn-22	dmc 1h	31.7926
	F07	SYBR	7ox-A1	Unkn-23	dmc 2h	29.1389
	F08	SYBR	7ox-A1	Unkn-23	dmc 2h	29.1615
	F09	SYBR	7ox-A1	Unkn-23	dmc 2h	29.2936
	F10	SYBR	2ox-A16	Unkn-24	dmc 2h	34.2587
	F11	SYBR	2ox-A16	Unkn-24	dmc 2h	33.4868
	F12	SYBR	2ox-A16	Unkn-24	dmc 2h	34.3326
	G01	SYBR	2ox-A1	Unkn-25	301 0h	28.9108
	G02	SYBR	2ox-A1	Unkn-25	301 0h	28.5918
	G03	SYBR	2ox-A1	Unkn-25	301 0h	28.6261
	G04	SYBR	2ox-A1	Unkn-26	301 1h	28.8075
	G05	SYBR	2ox-A1	Unkn-26	301 1h	29.1911
	G06	SYBR	2ox-A1	Unkn-26	301 1h	28.8444
	G07	SYBR	2ox-A1	Unkn-27	301 2h	27.5179
	G08	SYBR	2ox-A1	Unkn-27	301 2h	27.6336
	G09	SYBR	2ox-A1	Unkn-27	301 2h	27.5649
	H01	SYBR	2ox-A1	Unkn-29	dmc oh	28.2589
	H02	SYBR	2ox-A1	Unkn-29	dmc oh	28.722
	H03	SYBR	2ox-A1	Unkn-29	dmc oh	28.0258
	H04	SYBR	2ox-A1	Unkn-30	dmc 1h	29.0949
	H05	SYBR	2ox-A1	Unkn-30	dmc 1h	29.6679
	H06	SYBR	2ox-A1	Unkn-30	dmc 1h	29.649
	H07	SYBR	2ox-A1	Unkn-31	dmc 2h	28.3229
	H08	SYBR	2ox-A1	Unkn-31	dmc 2h	28.4392
	H09	SYBR	2ox-A1	Unkn-31	dmc 2h	28.4405

## Sheet: Sheet1
	Well	Fluor	Target	Content	Sample	Cq	SQ
	A01	SYBR	Actin	Unkn-01	301 0h	23.7106
	A02	SYBR	Actin	Unkn-01	301 0h	23.9549
	A03	SYBR	Actin	Unkn-01	301 0h	23.7815
	A04	SYBR	Actin	Unkn-02	301 1h	23.4034
	A05	SYBR	Actin	Unkn-02	301 1h	24.0396
	A06	SYBR	Actin	Unkn-02	301 1h	23.7708
	A07	SYBR	Actin	Unkn-03	301 2h	23.2459
	A08	SYBR	Actin	Unkn-03	301 2h	23.3972
	A09	SYBR	Actin	Unkn-03	301 2h	23.3828
	A10	SYBR	20ox-A4	Unkn-04	301 0h	30.9546
	A11	SYBR	20ox-A4	Unkn-04	301 0h	30.4167
	A12	SYBR	20ox-A4	Unkn-04	301 0h	30.7783
	B01	SYBR	Actin	Unkn-05	dmc oh	23.4237
	B02	SYBR	Actin	Unkn-05	dmc oh	23.4131
	B03	SYBR	Actin	Unkn-05	dmc oh	23.4166
	B04	SYBR	Actin	Unkn-06	dmc 1h	24.156
	B05	SYBR	Actin	Unkn-06	dmc 1h	24.1572
	B06	SYBR	Actin	Unkn-06	dmc 1h	24.1737
	B07	SYBR	Actin	Unkn-07	dmc 2h	22.9054
	B08	SYBR	Actin	Unkn-07	dmc 2h	22.9048
	B09	SYBR	Actin	Unkn-07	dmc 2h	22.9733
	B10	SYBR	20ox-A4	Unkn-08	dmc oh	30.2489
	B11	SYBR	20ox-A4	Unkn-08	dmc oh	30.0813
	B12	SYBR	20ox-A4	Unkn-08	dmc oh	30.953
	C01	SYBR	3ox-A2	Unkn-09	301 0h	28.2339
	C02	SYBR	3ox-A2	Unkn-09	301 0h	28.2164
	C03	SYBR	3ox-A2	Unkn-09	301 0h	27.7859
	C04	SYBR	3ox-A2	Unkn-10	301 1h	28.6485
	C05	SYBR	3ox-A2	Unkn-10	301 1h	29.0809
	C06	SYBR	3ox-A2	Unkn-10	301 1h	28.5493
	C07	SYBR	3ox-A2	Unkn-11	301 2h	28.424
	C08	SYBR	3ox-A2	Unkn-11	301 2h	28.3965
	C09	SYBR	3ox-A2	Unkn-11	301 2h	28.5145
	C10	SYBR	20ox-A4	Unkn-12	301 1h	30.7093
	C11	SYBR	20ox-A4	Unkn-12	301 1h	30.3381
	C12	SYBR	20ox-A4	Unkn-12	301 1h	30.3983
	D01	SYBR	3ox-A2	Unkn-13	dmc oh	28.5074
	D02	SYBR	3ox-A2	Unkn-13	dmc oh	28.7546
	D03	SYBR	3ox-A2	Unkn-13	dmc oh	28.683
	D04	SYBR	3ox-A2	Unkn-14	dmc 1h	29.0209
	D05	SYBR	3ox-A2	Unkn-14	dmc 1h	29.2904
	D06	SYBR	3ox-A2	Unkn-14	dmc 1h	29.0509
	D07	SYBR	3ox-A2	Unkn-15	dmc 2h	28.3504
	D08	SYBR	3ox-A2	Unkn-15	dmc 2h	28.1929
	D09	SYBR	3ox-A2	Unkn-15	dmc 2h	28.3896
	D10	SYBR	20ox-A4	Unkn-16	dmc 1h	30.6049
	D11	SYBR	20ox-A4	Unkn-16	dmc 1h	30.3474
	D12	SYBR	20ox-A4	Unkn-16	dmc 1h	30.7488
	E01	SYBR	3ox-B2	Unkn-17	301 0h	29.3357
	E02	SYBR	3ox-B2	Unkn-17	301 0h	29.3166
	E03	SYBR	3ox-B2	Unkn-17	301 0h	29.0711
	E04	SYBR	3ox-B2	Unkn-18	301 1h	29.0121
	E05	SYBR	3ox-B2	Unkn-18	301 1h	28.9914
	E06	SYBR	3ox-B2	Unkn-18	301 1h	29.2745
	E07	SYBR	3ox-B2	Unkn-19	301 2h	29.3109
	E08	SYBR	3ox-B2	Unkn-19	301 2h	28.8794
	E09	SYBR	3ox-B2	Unkn-19	301 2h	29.0674
	E10	SYBR	20ox-A4	Unkn-20	301 2h	30.8831
	E11	SYBR	20ox-A4	Unkn-20	301 2h	30.3874
	E12	SYBR	20ox-A4	Unkn-20	301 2h	30.0567
	F01	SYBR	3ox-B2	Unkn-21	dmc oh	28.9589
	F02	SYBR	3ox-B2	Unkn-21	dmc oh	28.7477
	F03	SYBR	3ox-B2	Unkn-21	dmc oh	28.6666
	F04	SYBR	3ox-B2	Unkn-22	dmc 1h	29.7928
	F05	SYBR	3ox-B2	Unkn-22	dmc 1h	30.0787
	F06	SYBR	3ox-B2	Unkn-22	dmc 1h	30.069
	F07	SYBR	3ox-B2	Unkn-23	dmc 2h	29.2614
	F08	SYBR	3ox-B2	Unkn-23	dmc 2h	29.2779
	F09	SYBR	3ox-B2	Unkn-23	dmc 2h	29.4141

## Sheet: Sheet2
	Well	Fluor	Target	Content	Sample	Cq	SQ
	A01	SYBR	Actin	Unkn-01	301 0h	24.6908
	A02	SYBR	Actin	Unkn-01	301 0h	24.6418
	A03	SYBR	Actin	Unkn-01	301 0h	24.6407
	A04	SYBR	Actin	Unkn-02	301 1h	24.1718
	A05	SYBR	Actin	Unkn-02	301 1h	23.9208
	A06	SYBR	Actin	Unkn-02	301 1h	23.9159
	A07	SYBR	Actin	Unkn-03	301 2h	23.2846
	A08	SYBR	Actin	Unkn-03	301 2h	23.2956
	A09	SYBR	Actin	Unkn-03	301 2h	23.3495
	B01	SYBR	Actin	Unkn-04	dmc oh	23.4569
	B02	SYBR	Actin	Unkn-04	dmc oh	23.4749
	B03	SYBR	Actin	Unkn-04	dmc oh	23.3882
	B04	SYBR	Actin	Unkn-05	dmc 1h	24.9097
	B05	SYBR	Actin	Unkn-05	dmc 1h	24.735
	B06	SYBR	Actin	Unkn-05	dmc 1h	24.6396
	B07	SYBR	Actin	Unkn-06	dmc 2h	23.4374
	B08	SYBR	Actin	Unkn-06	dmc 2h	23.3803
	B09	SYBR	Actin	Unkn-06	dmc 2h	23.8062
	C01	SYBR	2ox-D7	Unkn-07	301 0h	29.3437
	C02	SYBR	2ox-D7	Unkn-07	301 0h	29.0967
	C03	SYBR	2ox-D7	Unkn-07	301 0h	29.0526
	C04	SYBR	2ox-D7	Unkn-08	301 1h	28.274
	C05	SYBR	2ox-D7	Unkn-08	301 1h	28.3241
	C06	SYBR	2ox-D7	Unkn-08	301 1h	28.1347
	C07	SYBR	2ox-D7	Unkn-09	301 2h	28.3081
	C08	SYBR	2ox-D7	Unkn-09	301 2h	27.895
	C09	SYBR	2ox-D7	Unkn-09	301 2h	27.9969
	D01	SYBR	2ox-D7	Unkn-10	dmc oh	28.1917
	D02	SYBR	2ox-D7	Unkn-10	dmc oh	28.5677
	D03	SYBR	2ox-D7	Unkn-10	dmc oh	28.1316
	D04	SYBR	2ox-D7	Unkn-11	dmc 1h	29.306
	D05	SYBR	2ox-D7	Unkn-11	dmc 1h	29.0992
	D06	SYBR	2ox-D7	Unkn-11	dmc 1h	28.6986
	D07	SYBR	2ox-D7	Unkn-12	dmc 2h	28.4291
	D08	SYBR	2ox-D7	Unkn-12	dmc 2h	28.3254
	D09	SYBR	2ox-D7	Unkn-12	dmc 2h	28.5813
	E01	SYBR	2ox-A3	Unkn-13	301 0h	30.4037
	E02	SYBR	2ox-A3	Unkn-13	301 0h	31.0676
	E03	SYBR	2ox-A3	Unkn-13	301 0h	31.1529
	E04	SYBR	2ox-A3	Unkn-14	301 1h	29.695
	E05	SYBR	2ox-A3	Unkn-14	301 1h	29.435
	E06	SYBR	2ox-A3	Unkn-14	301 1h	29.4781
	E07	SYBR	2ox-A3	Unkn-15	301 2h	29.4854
	E08	SYBR	2ox-A3	Unkn-15	301 2h	29.4026
	E09	SYBR	2ox-A3	Unkn-15	301 2h	29.7031
	F01	SYBR	2ox-A3	Unkn-16	dmc oh	30.7569
	F02	SYBR	2ox-A3	Unkn-16	dmc oh	30.2708
	F03	SYBR	2ox-A3	Unkn-16	dmc oh	30.0598
	F04	SYBR	2ox-A3	Unkn-17	dmc 1h	30.8634
	F05	SYBR	2ox-A3	Unkn-17	dmc 1h	30.6511
	F06	SYBR	2ox-A3	Unkn-17	dmc 1h	30.5649
	F07	SYBR	2ox-A3	Unkn-18	dmc 2h	30.1729
	F08	SYBR	2ox-A3	Unkn-18	dmc 2h	29.8127
	F09	SYBR	2ox-A3	Unkn-18	dmc 2h	30.6407

## Sheet: Sheet3
	Well	Fluor	Target	Content	Sample	Cq	SQ
	A01	SYBR	Actin	Unkn-01	301 0h	21.2067
	A02	SYBR	Actin	Unkn-01	301 0h	22.0119
	A03	SYBR	Actin	Unkn-01	301 0h	21.9296
	A04	SYBR	Actin	Unkn-02	301 1h	21.9992
	A05	SYBR	Actin	Unkn-02	301 1h	22.1571
	A06	SYBR	Actin	Unkn-02	301 1h	22.0094
	A07	SYBR	Actin	Unkn-03	301 2h	20.5165
	A08	SYBR	Actin	Unkn-03	301 2h	21.1575
	A09	SYBR	Actin	Unkn-03	301 2h	21.1166
	B01	SYBR	Actin	Unkn-04	dmc 0h	22.0955
	B02	SYBR	Actin	Unkn-04	dmc 0h	22.0875
	B03	SYBR	Actin	Unkn-04	dmc 0h	21.9054
	B04	SYBR	Actin	Unkn-05	dmc 1h	22.8235
	B05	SYBR	Actin	Unkn-05	dmc 1h	23.1097
	B06	SYBR	Actin	Unkn-05	dmc 1h	23.0749
	B07	SYBR	Actin	Unkn-06	dmc 2h	22.2479
	B08	SYBR	Actin	Unkn-06	dmc 2h	21.5072
	B09	SYBR	Actin	Unkn-06	dmc 2h	22.0878
	C01	SYBR	2ox10	Unkn-07	301 0h	29.7332
	C02	SYBR	2ox10	Unkn-07	301 0h	30.054
	C03	SYBR	2ox10	Unkn-07	301 0h	29.8978
	C04	SYBR	2ox10	Unkn-08	301 1h	29.9512
	C05	SYBR	2ox10	Unkn-08	301 1h	29.7815
	C06	SYBR	2ox10	Unkn-08	301 1h	29.7488
	C07	SYBR	2ox10	Unkn-09	301 2h	29.9111
	C08	SYBR	2ox10	Unkn-09	301 2h	29.7478
	C09	SYBR	2ox10	Unkn-09	301 2h	29.6744
	D01	SYBR	2ox10	Unkn-10	dmc 0h	29.8426
	D02	SYBR	2ox10	Unkn-10	dmc 0h	29.3653
	D03	SYBR	2ox10	Unkn-10	dmc 0h	29.618
	D04	SYBR	2ox10	Unkn-11	dmc 1h	29.8486
	D05	SYBR	2ox10	Unkn-11	dmc 1h	29.4489
	D06	SYBR	2ox10	Unkn-11	dmc 1h	29.3753
	D07	SYBR	2ox10	Unkn-12	dmc 2h	28.8443
	D08	SYBR	2ox10	Unkn-12	dmc 2h	28.7594
	D09	SYBR	2ox10	Unkn-12	dmc 2h	28.9958

## Sheet: Sheet4
	Well	Fluor	Target	Content	Sample	Cq	SQ
	A01	SYBR	Actin	Unkn-01	301 0h	23.3228
	A02	SYBR	Actin	Unkn-01	301 0h	23.502
	A03	SYBR	Actin	Unkn-01	301 0h	23.7466
	A04	SYBR	Actin	Unkn-02	301 1h	23.1507
	A05	SYBR	Actin	Unkn-02	301 1h	23.6426
	A06	SYBR	Actin	Unkn-02	301 1h	23.0546
	A07	SYBR	Actin	Unkn-03	301 2h	22.2655
	A08	SYBR	Actin	Unkn-03	301 2h	22.616
	A09	SYBR	Actin	Unkn-03	301 2h	23.2209
	B01	SYBR	Actin	Unkn-04	dmc oh	23.2932
	B02	SYBR	Actin	Unkn-04	dmc oh	23.2343
	B03	SYBR	Actin	Unkn-04	dmc oh	23.3807
	B04	SYBR	Actin	Unkn-05	dmc 1h	23.9618
	B05	SYBR	Actin	Unkn-05	dmc 1h	24.1175
	B06	SYBR	Actin	Unkn-05	dmc 1h	24.1213
	B07	SYBR	Actin	Unkn-06	dmc 2h	22.6914
	B08	SYBR	Actin	Unkn-06	dmc 2h	22.7397
	B09	SYBR	Actin	Unkn-06	dmc 2h	22.8142
	C01	SYBR	20ox-B2	Unkn-07	301 0h	33.6274
	C02	SYBR	20ox-B2	Unkn-07	301 0h	33.2001
	C03	SYBR	20ox-B2	Unkn-07	301 0h	33.3566
	C04	SYBR	20ox-B2	Unkn-08	301 1h	35.995
	C05	SYBR	20ox-B2	Unkn-08	301 1h	34.5941
	C06	SYBR	20ox-B2	Unkn-08	301 1h	34.7172
	C07	SYBR	20ox-B2	Unkn-09	301 2h	32.475
	C08	SYBR	20ox-B2	Unkn-09	301 2h	32.8958
	C09	SYBR	20ox-B2	Unkn-09	301 2h	32.7275
	D01	SYBR	20ox-B2	Unkn-10	dmc oh	34.0969
	D02	SYBR	20ox-B2	Unkn-10	dmc oh	35.018
	D03	SYBR	20ox-B2	Unkn-10	dmc oh	35.0878
	D04	SYBR	20ox-B2	Unkn-11	dmc 1h	34.4736
	D05	SYBR	20ox-B2	Unkn-11	dmc 1h	35.0383
	D06	SYBR	20ox-B2	Unkn-11	dmc 1h	34.1534
	D07	SYBR	20ox-B2	Unkn-12	dmc 2h	33.8608
	D08	SYBR	20ox-B2	Unkn-12	dmc 2h	34.0576
	D09	SYBR	20ox-B2	Unkn-12	dmc 2h	33.4428

## Sheet: Sheet5
	Well	Fluor	Target	Content	Sample	Cq	SQ
	A01	SYBR	Actin	Unkn-01	301 0h	22.2721
	A02	SYBR	Actin	Unkn-01	301 0h	22.1455
	A03	SYBR	Actin	Unkn-01	301 0h	22.5511
	A04	SYBR	Actin	Unkn-02	301 1h	21.7388
	A05	SYBR	Actin	Unkn-02	301 1h	21.7748
	A06	SYBR	Actin	Unkn-02	301 1h	21.251
	A07	SYBR	Actin	Unkn-03	301 2h	21.6537
	A08	SYBR	Actin	Unkn-03	301 2h	22.1685
	A09	SYBR	Actin	Unkn-03	301 2h	21.7223
	B01	SYBR	Actin	Unkn-04	dmc oh	21.8503
	B02	SYBR	Actin	Unkn-04	dmc oh	21.8833
	B03	SYBR	Actin	Unkn-04	dmc oh	21.9245
	B04	SYBR	Actin	Unkn-05	dmc 1h	22.9395
	B05	SYBR	Actin	Unkn-05	dmc 1h	22.9709
	B06	SYBR	Actin	Unkn-05	dmc 1h	22.8423
	B07	SYBR	Actin	Unkn-06	dmc 2h	21.5332
	B08	SYBR	Actin	Unkn-06	dmc 2h	21.3933
	B09	SYBR	Actin	Unkn-06	dmc 2h	21.5693
	C01	SYBR	20ox-A1	Unkn-07	301 0h	29.9475
	C02	SYBR	20ox-A1	Unkn-07	301 0h	29.5541
	C03	SYBR	20ox-A1	Unkn-07	301 0h	29.2617
	C04	SYBR	20ox-A1	Unkn-08	301 1h	29.3899
	C05	SYBR	20ox-A1	Unkn-08	301 1h	29.0488
	C06	SYBR	20ox-A1	Unkn-08	301 1h	29.2362
	C07	SYBR	20ox-A1	Unkn-09	301 2h	29.7907
	C08	SYBR	20ox-A1	Unkn-09	301 2h	30.5
	C09	SYBR	20ox-A1	Unkn-09	301 2h	29.7059
	D01	SYBR	20ox-A1	Unkn-10	dmc oh	28.8642
	D02	SYBR	20ox-A1	Unkn-10	dmc oh	29.2439
	D03	SYBR	20ox-A1	Unkn-10	dmc oh	29.0525
	D04	SYBR	20ox-A1	Unkn-11	dmc 1h	30.1838
	D05	SYBR	20ox-A1	Unkn-11	dmc 1h	29.4234
	D06	SYBR	20ox-A1	Unkn-11	dmc 1h	29.9152
	D07	SYBR	20ox-A1	Unkn-12	dmc 2h	29.3661
	D08	SYBR	20ox-A1	Unkn-12	dmc 2h	28.936
	D09	SYBR	20ox-A1	Unkn-12	dmc 2h	29.3922
	E01	SYBR	3ox2-3D	Unkn-13	301 0h	26.3888
	E02	SYBR	3ox2-3D	Unkn-13	301 0h	26.7829
	E03	SYBR	3ox2-3D	Unkn-13	301 0h	26.9918
	E04	SYBR	3ox2-3D	Unkn-14	301 1h	26.1735
	E05	SYBR	3ox2-3D	Unkn-14	301 1h	26.2697
	E06	SYBR	3ox2-3D	Unkn-14	301 1h	26.3624
	E07	SYBR	3ox2-3D	Unkn-15	301 2h	25.7139
	E08	SYBR	3ox2-3D	Unkn-15	301 2h	25.7404
	E09	SYBR	3ox2-3D	Unkn-15	301 2h	25.7253
	F01	SYBR	3ox2-3D	Unkn-16	dmc oh	26.0866
	F02	SYBR	3ox2-3D	Unkn-16	dmc oh	26.1372
	F03	SYBR	3ox2-3D	Unkn-16	dmc oh	26.1407
	F04	SYBR	3ox2-3D	Unkn-17	dmc 1h	27.3424
	F05	SYBR	3ox2-3D	Unkn-17	dmc 1h	27.4934
	F06	SYBR	3ox2-3D	Unkn-17	dmc 1h	27.1516
	F07	SYBR	3ox2-3D	Unkn-18	dmc 2h	26.1955
	F08	SYBR	3ox2-3D	Unkn-18	dmc 2h	26.3547
	F09	SYBR	3ox2-3D	Unkn-18	dmc 2h	26.3743
	G01	SYBR	20ox3-3B	Unkn-19	301 0h	33.8773
	G02	SYBR	20ox3-3B	Unkn-19	301 0h	34.8
	G03	SYBR	20ox3-3B	Unkn-19	301 0h	34.1749
	G04	SYBR	20ox3-3B	Unkn-20	dmc oh	34.7881
	G05	SYBR	20ox3-3B	Unkn-20	dmc oh	34.5068
	G06	SYBR	20ox3-3B	Unkn-20	dmc oh	34.6286
	G07	SYBR	20ox3-3B	Unkn-21	301 1h	30.8407
	G08	SYBR	20ox3-3B	Unkn-21	301 1h	34.2348
	G09	SYBR	20ox3-3B	Unkn-21	301 1h	33.9593
	H01	SYBR	20ox3-3B	Unkn-22	dmc 1h	33.0803
	H02	SYBR	20ox3-3B	Unkn-22	dmc 1h	33.5457
	H03	SYBR	20ox3-3B	Unkn-22	dmc 1h	34.2748
	H04	SYBR	20ox3-3B	Unkn-23	301 2h	32.0535
	H05	SYBR	20ox3-3B	Unkn-23	301 2h	33.6222
	H06	SYBR	20ox3-3B	Unkn-23	301 2h	34.6012
	H07	SYBR	20ox3-3B	Unkn-24	dmc 2h	31.8432
	H08	SYBR	20ox3-3B	Unkn-24	dmc 2h	33.3565
	H09	SYBR	20ox3-3B	Unkn-24	dmc 2h	34.9267
