# Supplementary material for: Wheat gibberellin oxidase genes and their functions in regulating tillering
Source: PeerJ journal article supplement (doi:10.7717/peerj.15924), 2023-09-01
Supplement: supplementary_file_1.zip [file Figure 9B.xlsx]

## Sheet: 0
	Well	Fluor	Target	Content	Sample	Cq	SQ
	A01	SYBR	Actin	Unkn-01	OE_L299	21.74
	A02	SYBR	Actin	Unkn-01	OE_L299	21.44
	A03	SYBR	Actin	Unkn-01	OE_L299	22.04
	A04	SYBR	Actin	Unkn-02	OE_L306	21.91
	A05	SYBR	Actin	Unkn-02	OE_L306	22.3
	A06	SYBR	Actin	Unkn-02	OE_L306	21.58
	A07	SYBR	Actin	Unkn-03	OE_L314	22.13
	A08	SYBR	Actin	Unkn-03	OE_L314	21.4
	A09	SYBR	Actin	Unkn-03	OE_L314	22.28
	A10	SYBR	Actin	Unkn-04	OE_L331	22.99
	A11	SYBR	Actin	Unkn-04	OE_L331	23.18
	A12	SYBR	Actin	Unkn-04	OE_L331	23.12
	B01	SYBR	Actin	Unkn-05	OE_L342	23.21
	B02	SYBR	Actin	Unkn-05	OE_L342	23.38
	B03	SYBR	Actin	Unkn-05	OE_L342	23.37
	B04	SYBR	Actin	Unkn-06	OE_L351	21.28
	B05	SYBR	Actin	Unkn-06	OE_L351	21.57
	B06	SYBR	Actin	Unkn-06	OE_L351	21.55
	B07	SYBR	Actin	Unkn-07	OE_L358	23.05
	B08	SYBR	Actin	Unkn-07	OE_L358	23.87
	B09	SYBR	Actin	Unkn-07	OE_L358	23.47
	B10	SYBR	Actin	Unkn-08	OE_L364	21.87
	B11	SYBR	Actin	Unkn-08	OE_L364	22.08
	B12	SYBR	Actin	Unkn-08	OE_L364	22.12
	C01	SYBR	Actin	Unkn-09	OE_L367	22.44
	C02	SYBR	Actin	Unkn-09	OE_L367	22.38
	C03	SYBR	Actin	Unkn-09	OE_L367	22.42
	C04	SYBR	Actin	Unkn-10	OE_L369	22.01
	C05	SYBR	Actin	Unkn-10	OE_L369	22.05
	C06	SYBR	Actin	Unkn-10	OE_L369	22
	C07	SYBR	Actin	Unkn-11	WT	21.84
	C08	SYBR	Actin	Unkn-11	WT	21.73
	C09	SYBR	Actin	Unkn-11	WT	20.83
	D01	SYBR	TaGA7ox-A1	Unkn-12	OE_L299	28.06
	D02	SYBR	TaGA7ox-A1	Unkn-12	OE_L299	27.61
	D03	SYBR	TaGA7ox-A1	Unkn-12	OE_L299	27.52
	D04	SYBR	TaGA7ox-A1	Unkn-13	OE_L306	30.67
	D05	SYBR	TaGA7ox-A1	Unkn-13	OE_L306	30.19
	D06	SYBR	TaGA7ox-A1	Unkn-13	OE_L306	30.23
	D07	SYBR	TaGA7ox-A1	Unkn-14	OE_L314	28.51
	D08	SYBR	TaGA7ox-A1	Unkn-14	OE_L314	27.62
	D09	SYBR	TaGA7ox-A1	Unkn-14	OE_L314	27.63
	D10	SYBR	TaGA7ox-A1	Unkn-15	OE_L331	28.88
	D11	SYBR	TaGA7ox-A1	Unkn-15	OE_L331	29.07
	D12	SYBR	TaGA7ox-A1	Unkn-15	OE_L331	29.15
	E01	SYBR	TaGA7ox-A1	Unkn-16	OE_L342	30.48
	E02	SYBR	TaGA7ox-A1	Unkn-16	OE_L342	29.61
	E03	SYBR	TaGA7ox-A1	Unkn-16	OE_L342	29.9
	E04	SYBR	TaGA7ox-A1	Unkn-17	OE_L351	28.27
	E05	SYBR	TaGA7ox-A1	Unkn-17	OE_L351	28.28
	E06	SYBR	TaGA7ox-A1	Unkn-17	OE_L351	28.16
	E07	SYBR	TaGA7ox-A1	Unkn-18	OE_L358	30.41
	E08	SYBR	TaGA7ox-A1	Unkn-18	OE_L358	30.31
	E09	SYBR	TaGA7ox-A1	Unkn-18	OE_L358	29.7
	E10	SYBR	TaGA7ox-A1	Unkn-19	OE_L364	28.57
	E11	SYBR	TaGA7ox-A1	Unkn-19	OE_L364	28.26
	E12	SYBR	TaGA7ox-A1	Unkn-19	OE_L364	28.5
	F01	SYBR	TaGA7ox-A1	Unkn-20	OE_L367	29.38
	F02	SYBR	TaGA7ox-A1	Unkn-20	OE_L367	29.41
	F03	SYBR	TaGA7ox-A1	Unkn-20	OE_L367	29.49
	F04	SYBR	TaGA7ox-A1	Unkn-21	OE_L369	28.44
	F05	SYBR	TaGA7ox-A1	Unkn-21	OE_L369	28.44
	F06	SYBR	TaGA7ox-A1	Unkn-21	OE_L369	28.41
	F07	SYBR	TaGA7ox-A1	Unkn-22	WT	33.08
	F08	SYBR	TaGA7ox-A1	Unkn-22	WT	31.73
	F09	SYBR	TaGA7ox-A1	Unkn-22	WT	31.47
